1 **Title: Identification of erythroid cell positive blood transcriptome phenotypes**  
2 **associated with severe respiratory syncytial virus infection**

3  
4 Authors: Darawan Rinchai<sup>1</sup>, Matthew B Altman<sup>2,3</sup>, Oceane Konza<sup>4</sup>, Signe Hässler<sup>4,5</sup>,  
5 Federica Martina<sup>4</sup>, Mohammed Toufiq<sup>1</sup>, Mathieu Garand<sup>1</sup>, Basirudeen Kabeer<sup>1</sup>, Karolina  
6 Palucka<sup>6</sup>, Asuncion Mejias<sup>6</sup>, Octavio Ramilo<sup>6</sup>, Davide Bedognetti<sup>1</sup>, Encarnita Mariotti-  
7 Ferrandiz<sup>5</sup>, David Klatzmann<sup>4,5</sup> and Damien Chaussabel<sup>1</sup>

8  
9  
10 Affiliations:

11 <sup>1</sup> Sidra Medicine, Doha, Qatar

12 <sup>2</sup> Benaroya Research Institute, Seattle, WA, USA

13 <sup>3</sup> University of Washington, Seattle, WA, USA

14 <sup>4</sup> AP-HP, Hôpital Pitié-Salpêtrière, Biotherapy (CIC-BTi) and Inflammation-  
15 Immunopathology-Biotherapy Department (i2B), Paris, France

16 <sup>5</sup> Sorbonne Université, INSERM, Immunology-Immunopathology-Immunotherapy (i3),  
17 Paris, France

18 <sup>6</sup> Jackson Laboratory for Genomic Medicine, Farmington, CT, United States

19 <sup>7</sup> Division of Infectious Diseases, Nationwide Children's Hospital, Columbus, OH,  
20 United States

21

22

23 **ABSTRACT**

24 Biomarkers to assess the severity of acute respiratory syncytial virus (RSV) infection  
25 are needed. We conducted a meta-analysis of 490 unique profiles from six public RSV  
26 blood transcriptome datasets. A repertoire of 382 well-characterized transcriptional  
27 modules was used to define dominant host responses to RSV infection. The  
28 consolidated RSV cohort was stratified according to four traits: “interferon response”  
29 (IFN), “neutrophil-driven inflammation” (Infl), “cell cycle” (CC), and “erythrocytes” (Ery).  
30 Eight prevalent blood transcriptome phenotypes were thus identified. Among those  
31 three Ery+ phenotypes comprised higher proportions of patients requiring intensive  
32 care. We posit that the erythrocyte module is linked to an overabundance of  
33 immunosuppressive erythroid cells that might underlie progression to severe RSV  
34 infection. These findings outline potential priority areas for biomarker development and  
35 investigations into the immune biology of RSV infection. The approach that was  
36 employed here will also permit to delineate prevalent blood transcriptome phenotypes in  
37 other settings.

38

39  
40  
41  
42  
43  
44  
45  
46  
47  
48  
49  
50  
51  
52  
53  
54  
55  
56  
57  
58  
59  
60  
61

## INTRODUCTION

Respiratory syncytial virus (RSV) infection is the leading cause of hospitalization and the second cause of infant mortality worldwide (1). There are well-characterized populations at risk for severe disease, but most infants who develop a severe RSV infection have no underlying health conditions (2,3). The mechanisms underlying RSV morbidity are poorly understood, but studies suggest that immature or under-developed lungs and/or a dysregulated immune response might have a role (4).

Several groups of researchers, including us, have undertaken blood transcriptome profiling studies of patients with RSV infection (5–13). This approach involves measuring the abundance of blood leukocyte transcripts on a genome-wide scale (14,15). Whole blood comprises a heterogeneous mix of leukocyte populations; thus, changes in transcript abundance might be attributable to either gene expression regulation or relative changes in cell abundance. Regardless, blood transcriptome profiling remains one of the most straightforward approaches to implement in clinical settings and on a large scale (15). Among the RSV blood transcriptome studies, several aimed to identify factors associated with severe disease. For example, we reported an increase in abundance of neutrophil, inflammation and erythrocyte genes in severe pediatric cases (7). Brand et al. pinpointed that an increase in abundance of transcripts coding for Olfactomedin 4, a factor involved in inflammatory responses, is strongly associated with disease severity (10). More recently, Do et al. linked RSV disease severity with follicular T helper cell development and BCL6-dependant inflammation (9).

62 Building consensus around biomarker signatures and finding a path to clinical  
63 utility may involve performing meta-analyses that regroup datasets derived from multiple  
64 independent studies (16). Work that permitted the development of novel diagnostic  
65 products for sepsis provides a good example (17,18). An obvious benefit of  
66 consolidating data from multiple studies is that it permits to achieve larger sample sizes.  
67 Arguably the heterogeneity of the patient populations and clinical settings could also  
68 help improve the robustness of the resulting biomarker signatures (16). Challenges  
69 include the presence of important technical variability between studies, such as in the  
70 sampling methods, the profiling platform used or data pre-processing. Another potential  
71 limitation is the varying depth and lack of harmonization of sample or subject  
72 information available from one study to another.

73 Such meta-analyses tend to focus on the identification of consensus biomarker  
74 signatures: here, the deliverable is a set of differentially expressed genes or predictors  
75 of a given clinical outcome. In the present work we endeavored to identify discrete  
76 molecular traits (e.g. “interferon = IFN”, “inflammation = Inf”, “Erythrocytes” = Ery”)  
77 underlying inter-individual differences among patients with an RSV infection. We used  
78 such traits to define blood transcriptome phenotypes and to stratify patient cohorts on  
79 the basis of their individual status of each trait: increased, decreased or unchanged vs  
80 the uninfected comparators (e.g. of a given phenotype being IFN+ Inf0 Ery-). The next  
81 key step was to assess the clinical relevance of such a classification, for instance in  
82 terms of differences in the degrees of RSV disease severity. We finally endeavored to  
83 investigate the biological basis of the inter-individual variation being measured, in



84 particular for the traits showing the highest degree of association with severe  
85 presentations.

86 A fixed repertoire of transcriptional modules formed the basis for this work. This  
87 repertoire consists of a collection of co-expressed gene sets. Co-expression was  
88 determined in a collection of reference datasets encompassing 16 distinct  
89 immunological states (19) (see methods section). This 382-module repertoire is “fixed”,  
90 in the sense that it serves as a reusable framework for analysis and interpretation of  
91 transcriptome data. As such, transcriptional modules are not re-formed every time a  
92 new dataset is analyzed. Using transcriptional modules is a key aspect of our approach.  
93 Indeed, it is the drastic reduction in the number of variables that permits the selection of  
94 molecular traits that underpin patient phenotyping and cohort stratification. The fact that  
95 this repertoire is fixed is also important, as it permits considerable functional annotations  
96 of these transcriptional modules. This annotation can in turn prove critical in unravelling  
97 the biological significance of the patient phenotypes being defined.

98 In summary, we present here a meta-analysis of six RSV blood transcriptome  
99 datasets that include 490 unique subject profiles. Specifically, we aimed to: 1) measure  
100 inter-individual variability and molecularly stratify RSV patients; 2) identify the  
101 associations between patient molecular phenotypes, clinical parameters and outcomes;  
102 and 3) identify and interpret the immunobiological processes associated with each  
103 molecular phenotype.

104

105

## 106 **RESULTS**

### 107 **A collection of RSV blood transcriptome datasets can be assembled from earlier** 108 **submissions to public repositories.**

109 Several researchers investigating the host responses to RSV infection have made their  
110 blood transcriptome datasets public. We consolidated the datasets contributed by six  
111 independent studies (5–7,20–22) and performed meta-analyses to delineate distinct  
112 blood transcriptome phenotypes among RSV subjects. A criterion for including studies  
113 in this meta-analysis was the availability of uninfected controls. This point is important  
114 because control groups serve as a common denominator between studies and provide  
115 the basis for data normalization. Thus, public datasets for which such controls were  
116 unavailable could not be included in this meta-analysis.

117 As each study had different goals and designs, it was first important to identify  
118 the key differences, so that they are accounted for when interpreting the meta-analysis  
119 results. Information about the six studies is summarized in **Table 1**. The most notable  
120 outlier in this collection was the dataset from Liu et al. [GSE73072 (21)] as it consisted  
121 of samples from adult subjects collected before and after experimental exposure to  
122 RSV. All other studies comprised pediatric subjects with community-acquired RSV  
123 infection and a separate group of uninfected controls. Among the latter, the study by  
124 Mejias et al. addressed the question of disease severity most directly [GSE38900 (7)],  
125 while the work of de Steenhuijsen Piters [GSE77087 (6)] examined the effects of of  
126 microbiome composition on the disease course and blood transcriptome signatures.  
127 Rodriguez-Fernandez et al. examined the influence of RSV genotypes on blood  
128 transcriptional signatures [GSE103842 (5)]. The study from McDonald et al. focused on

129 identifying pathways involved in disease pathogenesis [GSE80179 (22)]. In the study by  
130 Herberg et al. [GSE42026 (20)] the RSV dataset was mostly used as a comparator in a  
131 study focusing on responses to H1N1 influenza. The latter two studies were conducted  
132 in Europe, while all others were conducted in the United States. Finally, in terms of  
133 technical variables, samples from the adult exposure study were run using Affymetrix  
134 GeneChips, while the others were run on Illumina BeadArrays. The sample types were  
135 otherwise homogenous across all studies and consisted of RNA stabilized whole blood.  
136 The studies used one of two popular commercial sample collection tubes for this type of  
137 application: Paxgene blood RNA tubes (3 studies) or Tempus tubes (3 studies).

138         Altogether the consolidated dataset collection that was constituted for this meta-  
139 analysis encompassed 490 profiles, of which 319 were from subjects with an RSV  
140 infection. We hypothesized that this expanded sample size should permit us to define  
141 blood transcriptome phenotypes and stratify patient cohorts more effectively than each  
142 individual study could.

143

144 **Comparing the changes in transcript abundance across module aggregates**  
145 **identifies a consensus RSV signature.**

146         Extracting meaningful biological information from large-scale datasets is a  
147 notable challenge. Meta-analyses are particularly compounded by the high degree of  
148 technical variation existing between independent studies. To at least partly address  
149 such challenges, we used a fixed repertoire of transcriptional modules (19) as a  
150 framework for data analysis and interpretation. In brief, this repertoire comprises 382  
151 modules, each formed by a set of genes grouped together based on patterns of co-

152 expression across a reference collection of 16 blood transcriptome datasets. This  
153 collection was comprised of 985 unique transcriptome profiles and spanned 16 different  
154 immunologically relevant pathological or physiological states. A higher degree of  
155 organization was further achieved by organizing, in turn, the modules into 38  
156 “aggregates” (designated A1-A38). This grouping was based on similarities in patterns  
157 of transcript abundance, determined this time at the module-level and across the 16  
158 reference datasets. Each aggregate comprised between 1 and 42 modules (27 of the 28  
159 aggregates comprised 2 modules or more).

160         Here, we mapped the changes in transcript abundance for each dataset against  
161 this modular framework. From a practical perspective, this means determining for a  
162 given module the percentage of its constitutive transcripts that are significantly changed.  
163 This procedure is repeated in turn for each module and across each one of the six  
164 datasets comprised in our collection. This approach made it possible to assess, as a  
165 first step, the degree of consistency in the RSV response signatures across the  
166 datasets. To facilitate interpretation, we represented the changes at the least granular  
167 level by showing on a heatmap the abundance profiles for each of the six RSV datasets  
168 (columns) across 27 module aggregates (rows) (Figure 1A). From this highly reduced  
169 set of variables, we could pinpoint the most conserved molecular signatures across the  
170 six datasets. These included seven aggregates showing consistent increases in  
171 transcript abundance (observed in at least 5/6 datasets: A26, A27, A28, A33, A35, A37,  
172 A38) and two aggregates showing consistent decreases (A1, A3). Changes were also  
173 observed for another set of modules but in only 3/6 RSV datasets (A15, A16, A29, A30,  
174 A34, A36). Technical or biological parameters (Table 1) did not yield an obvious

175 explanation for the differences between these two groups of studies. The amplitude of  
176 the changes in other aggregates was minimal. Taken together, this step permitted the  
177 mapping of transcriptional changes measured across different RSV data using the same  
178 transcriptional module framework. This was useful in relating changes observed  
179 between the studies and pinpointing signatures that appear to be most robustly  
180 associated with RSV infection.

181

182 **Changes in transcript abundance can be mapped to a fixed transcriptional**  
183 **module repertoire to facilitate functional interpretation.**

184 To functionally interpret the conserved signatures observed across RSV datasets, a  
185 more granular level of information is needed. We thus examined transcriptomic changes  
186 at the level of the modules forming the 27 aggregates mentioned above. We  
187 represented the changes in transcript abundance as grid plots for each of the RSV  
188 datasets (**Figure 1B, Supplementary Figure 1**). A first vertical reading of the grid  
189 across the rows provides a sense of the changes at the aggregate level already  
190 summarized in the heatmap that was presented earlier (**Figure 1A**). A second  
191 horizontal reading across the columns provides a sense of the changes occurring at the  
192 module level within each of the aggregates.

193 Because the positions on the grid are fixed, it is possible to overlay other  
194 information, such as functional annotations (color-coded grid in **Figure 1B**). We found  
195 that some of the conserved signatures that were increased during RSV infection  
196 comprised modules preferentially associated with interferon responses (A28),  
197 inflammation (A33, A35), erythrocytes (A37, A38) and cell cycle (A27), while those that

198 were decreased were associated with lymphocytic responses (A1, A3). Some of these  
199 responses are further interpreted below, and all details are accessible via interactive  
200 web presentations for modules constituting each aggregate (web links are listed in  
201 **Table 2**). The presentations include reports from functional profiling analyses carried  
202 out using different tools. Heatmaps representing the patterns of abundance for  
203 transcripts constituting each module across reference datasets are also available.  
204 Furthermore, a dedicated web application was develop in support of the work presented  
205 here and permits users to access the fingerprint grid plots presented here and generate  
206 other types of plots which are presented throughout this manuscript. This resource can  
207 be accessed via this link: [https://drinchai.shinyapps.io/RSV\\_Meta\\_Module\\_analysis/](https://drinchai.shinyapps.io/RSV_Meta_Module_analysis/). A  
208 video demonstration can be accessed here: <https://youtu.be/htNSMreM8es>.

209 In summary, we mapped the conserved RSV signatures identified to a well-  
210 annotated modular framework. This mapping made it relatively straightforward to assign  
211 each signature to a predetermined functional category. The added granularity and  
212 available online resources make it possible to further dissect those signatures in  
213 subsequent analyses, as exemplified below.

214

### 215 **Blood transcriptional signature present a high level of inter-individual among** 216 **cohorts of RSV patients**

217 Blood transcriptome profiling provides a means to measure inter-individual differences  
218 with a high degree of resolution. Understanding the biological and clinical significance of  
219 this variability is important but requires the study of large patient cohorts. The collective  
220 re-analysis of the six datasets assembled here provides a unique opportunity to

221 investigate inter-individual differences among patients with RSV infection at the  
222 molecular level.

223         The approach that we used next to map changes in transcript abundance for  
224 individual patients against the repertoire of transcriptional modules is very similar to that  
225 described above for groups of patients. We expressed the changes for each individual  
226 RSV patient as a percentage of constitutive genes for which the abundance was  
227 increased or decreased compared to the respective control group (see methods for  
228 details). As an illustration, we generated a heatmap (**Figure 2**) of the results obtained  
229 for subjects comprising the de Steenhuijsen Piters dataset (**Figure 1B**). The patterns in  
230 the changes in abundance are only shown for the modules constituting the nine  
231 aggregates deemed to be conserved across the collection of RSV datasets (highlighted  
232 in **Figure 1**). We generated similar plots for each of the remaining datasets  
233 (**Supplementary File 1**). There are also accessible and customizable via our web  
234 application ([https://drinchai.shinyapps.io/RSV\\_Meta\\_Module\\_analysis/](https://drinchai.shinyapps.io/RSV_Meta_Module_analysis/)).

235         From the heatmaps, we observed that inter-individual variability exists even for  
236 signatures that at the group level were well-conserved across the six datasets (**Figure**  
237 **1A**). In reality, only a minority of patients in this illustrative dataset (11/81) matched the  
238 prototypical pattern defined above based on conserved changes observed for nine  
239 module aggregates (i.e. A1- A3- A27+ A28+ A33+ A35+ A37+ A38+; **Figure 2**). The  
240 degree of inter-individual variability differed from one module aggregate to another. For  
241 example, in the modules forming aggregates A1 (Lymphocytic) or A33 (Inflammation),  
242 changes in abundance only varied in amplitude without, for the most part, showing an

243 inversion of trends. In other modules, inverted trends were much more common, as  
244 exemplified by A37 (Erythrocytes).

245 Taken together, examining changes in transcript abundance at the level of  
246 individuals revealed a significant degree of heterogeneity among cohorts of RSV  
247 patients. This paradigm was also true for signatures deemed to be conserved when  
248 carrying out comparisons at the group level.

249

### 250 **Distinct blood transcriptome phenotypes are identified among a consolidated** 251 **cohort of RSV patients**

252 The fact that the consensus disease signature defined earlier was not reflected at the  
253 level of individual patients highlighted the need to characterize distinct RSV blood  
254 transcriptome phenotypes. For this, we used the combined set of patients from the six  
255 public transcriptome datasets. First, we generated PCA plots to evaluate the sources of  
256 variance among this composite set of samples (**Figure 3A**). The results indicated the  
257 absence of study bias when abundance measures were normalized to the respective  
258 control group and reduced to module-level summarized values. This finding was largely  
259 confirmed when representing inter-individual differences on a tSNE plot (**Figure 3B**)  
260 (23). One dataset did show partial separation from the others, but this only concerned a  
261 minority of subjects and could also be attributable to biological sources. The same shift  
262 was observed on the PCA plot but only along PC3, which accounts for only 9% of the  
263 overall variance.

264 As a first step, we sought to identify signatures with the highest degree of inter-  
265 patient variability, assuming that these would be best able to discriminate patients



266 according to phenotypes. We identified these signatures at the least granular, module-  
267 aggregate level, thus starting from a set of only 38 variables (**Supplementary Figure**  
268 **2**). We selected the following four aggregates: 1) A27, comprising five modules  
269 functionally associated with the “cell cycle”; 2) A28, comprising six modules functionally  
270 associated with the “interferon response”; 3) A35, comprising 21 modules predominantly  
271 associated with “inflammation”; and 4) A37, comprising 11 modules predominantly  
272 associated with “erythrocytes”. We discarded other aggregates that exhibited a similar  
273 degree of inter-patient variability due to likely redundancy with the four selected  
274 aggregates. These aggregates included A33, which like A35 is also associated with  
275 “inflammation”, and A38, which like A37 is associated with “erythrocytes”.

276         Next, we assigned the status for each aggregate signature in a given individual  
277 using the corresponding percentage of increased or decreased transcripts: if the value  
278 was >15% the aggregate was considered to be increased (noted as +), if ≤15% it was  
279 considered to be decreased (noted as -), else it was considered not changed (noted as  
280 0). For example, Infl0/IFN+/CC+/Ery-. We then generated the distribution of subjects  
281 constituting the combined RSV cohorts across all 81 possible Infl/IFN/CC/Ery  
282 phenotypes (**Figure 4**). We found that a small subset of phenotypes comprised a higher  
283 number of patients than others (>10 per phenotype). These phenotypes were all  
284 positive for the interferon “trait” (IFN+), positive or showed no changes for the  
285 “inflammation” and “cell cycle” traits (Infl+/0 or CC+/0) and exhibited any erythrocytes  
286 trait status (Ery+/0/-). Phenotypes where the interferon status was unchanged or  
287 decreased were comparatively less prevalent (five patients per group at most), and so

288 were phenotypes where interferon was increased but inflammation or cell cycle  
289 phenotypes were decreased.

290 Overall, we have shown here that a principled approach using a small subset of  
291 highly reduced variables can identify a discrete number of interpretable RSV blood  
292 transcriptome phenotypes. It should be noted, however, that alternate classifications  
293 could be obtained by modifying the selection criteria. This would be the case if, for  
294 instance, more emphasis was put on biological significance than inter-patient variability.

295

296 **A subset of RSV blood transcriptome phenotypes is associated with severe**  
297 **disease**

298 An obvious next question is whether the stratification of RSV patients according to blood  
299 transcriptome phenotypes, such as those described above, have any clinical relevance.

300 The extent of phenotypic information made available alongside the blood transcriptome  
301 datasets varied significantly from study to study. Notably, pertinent information reflecting  
302 disease severity (e.g. respiratory rate, transcutaneous O<sub>2</sub> saturation) were lacking for  
303 many patients. As a result, we had to use a relatively crude metric of disease severity  
304 that relied on the type of care the patient required; i.e. whether they were outpatients,  
305 inpatients cared for in the ward or were admitted to the pediatric intensive care unit  
306 (PICU).

307 We first visualized the patterns of transcript abundance at the module level for  
308 individuals belonging to the seven most prevalent phenotypes (**Figure 5**). This heatmap  
309 verified that the phenotypic categories presented a high degree of homogeneity. Upon  
310 overlaying the phenotypic information on this plot, we gained a first indication of a

311 possible association between age and disease severity. Specifically, it was possible to  
312 discern a trend towards a younger age among Ery+ subjects in comparison to Ery- or  
313 Ery0 subjects. Importantly, the different studies also seemed to be well represented in  
314 each of the phenotypes, indicative of their underpinnings by biological rather than  
315 technical factors.

316 We then looked at the relative proportion of severe patients for each high-prevalence  
317 phenotype and the contributions by the different studies (**Figure 6A**). Four of the eight  
318 phenotypes were Ery+, of which three comprised a proportion of PICU patients that was  
319 on average 5.6 times higher than the four Ery- and Ery0 phenotypes. The Ery+ patients  
320 included the quadruple positive IFN+/Infl+/CC+/Ery+ phenotype with 32% of PICU  
321 patients, while its IFN+/Infl+/CC+/Ery- counterpart had 12% of patients. We found no  
322 severe patients in the IFN+/Infl+/CC0/Ery0 group. Furthermore, subjects with Ery+  
323 phenotypes were significantly younger than subjects with Ery- phenotypes ( $p < 0.001$ ,  
324 **Figure 6B**).

325 We next endeavored to determine whether the presence of the Ery trait was  
326 associated with heightened severity, regardless of age. For this we examined the  
327 distribution of severe cases across the same phenotypes but focusing on infants <4  
328 months old (**Figure 6A**). Again, the severe cases were distributed preferentially among  
329 Ery+ phenotypes [Ery+ = 29 PICU) cases, Ery-/0 = 4 PICU cases; of note the  
330 IFN+/Infl+/CC+/Ery- phenotype comprised only two patients, one of which was a PICU  
331 case].

332 Finally, we investigated the associations between each of the four traits used for  
333 RSV patient phenotyping and stratification, and disease severity (**Figure 7**). Here we

334 found that the abundance of transcripts forming the A37/erythrocytes cells aggregate  
335 were significantly increased in patients cared in the PICU compared to the ward (Ery  
336 trait;  $p < 0.01$ ). We made a similar finding for the A35/“inflammation” aggregate, although  
337 to a lesser degree (Infl trait ;  $p < 0.05$ ). We found no significant differences were found for  
338 the A27/cell cycle or A28/interferon aggregates. Associations can be explored for  
339 various aggregates as a function of age via our web application  
340 ([https://drinchai.shinyapps.io/RSV\\_Meta\\_Module\\_analysis/](https://drinchai.shinyapps.io/RSV_Meta_Module_analysis/)).

341 Taken together, these findings suggest that our RSV stratification system might be  
342 clinically relevant. This conclusion is illustrated by the fact that a high proportion of  
343 severe subjects was observed among most phenotypes positive for the Ery trait. This  
344 finding might be particularly relevant in infants <4 months–of-age who would otherwise  
345 carry a similar risk of developing severe RSV disease when taking age into  
346 consideration.

347

### 348 **The RSV “Erythrocyte” signature is shared with melanoma patients and liver** 349 **transplant recipients**

350 Beyond the question of clinical relevance of these RSV blood transcriptome  
351 phenotypes, we next sought to understand their biological significance. For this we  
352 relied on several resources. First, we used a web application providing access to a  
353 reference collection of module fingerprints for the 16 pathological or physiological states  
354 (19) (accessible via: [https://drinchai.shinyapps.io/dc\\_gen3\\_module\\_analysis/#](https://drinchai.shinyapps.io/dc_gen3_module_analysis/#);  
355 demonstration video: [https://youtu.be/y\\_7xKJo5e4](https://youtu.be/y_7xKJo5e4)).

356 We generated fingerprint grid plots to compare the changes in transcript  
357 abundance in acute influenza and RSV infections (**Figure 8A**). Acute influenza infection  
358 highly resembles RSV infection in terms of clinical presentation, especially in infants. As  
359 could be expected, the fingerprints of both of these respiratory infections featured a  
360 potent interferon signature (modules in aggregate A28; i.e. the IFN trait defined earlier).  
361 The modules associated with inflammation (comprised in aggregate A35; Infl trait) were  
362 also generally increased in both diseases. However, one of the most marked  
363 differences between the influenza and RSV fingerprints concerned the erythrocyte  
364 signature (aggregate A37; Ery trait), which was consistently increased in RSV but was  
365 unchanged in influenza.

366 Another fingerprint dominated by an interferon signature was that of systemic  
367 lupus erythematosus (SLE), but as was the case for influenza, it did not comprise an  
368 “A37/erythrocyte” signature. Among the fingerprints of other reference datasets, those  
369 of *Staphylococcus aureus* infection, liver transplantation and metastatic melanoma also  
370 showed an elevation in abundance for transcripts constituting modules belonging to the  
371 A37 aggregate (**Figure 8A**). The *S. aureus* infection fingerprint showed the highest  
372 degree of alteration overall, with widespread changes in transcript levels occurring in  
373 most aggregates. This finding contrasts with the fingerprint for metastatic melanoma,  
374 which for the most part was quiescent, except for a marked increase in the abundance  
375 of genes constituting the A37 modules. The signature observed in liver transplant  
376 recipients receiving maintenance chemotherapy was more perturbed than that of  
377 melanoma patients, but it was likewise characterized by an increase in the abundance  
378 of transcripts constituting the “A37/erythrocyte” modules.

379           Next, we used the same web application to examine module abundance profiles  
380 specifically for the IFN, Infl, CC and Ery traits across all 16 reference datasets (**Figure**  
381 **8B**). For the IFN trait (A28), RSV clustered among the diseases showing an  
382 intermediate level of response, along with liver transplant recipients, patients with  
383 systemic onset juvenile idiopathic arthritis (SoJIA), *S. aureus* infection (pediatric) or  
384 sepsis caused by various pathogens (adults). Influenza was clustered among diseases  
385 showing the highest IFN responses, including other infections such as tuberculosis or  
386 HIV, as well as systemic lupus erythematosus (SLE) (**Supplementary Figure 3**). For  
387 the Infl trait (A35), RSV clustered again with diseases showing an intermediate  
388 response level, and predictably lower than those measured not only in SoJIA, sepsis,  
389 and *S. aureus*, but also influenza infection. For the CC trait (A27), the RSV and HIV  
390 cohorts formed a cluster with the highest increase in abundance. Finally, for the Ery trait  
391 (A37) the RSV cohort was one of only three diseases in the high abundance cluster,  
392 along with the melanoma and liver transplant cohorts. We observed increases to a  
393 lesser extent in diseases characterized by overt systemic inflammation, such as sepsis  
394 or SoJIA, as well as in pregnant women. This trait tended to be decreased in other viral  
395 illnesses, such as influenza and HIV infection.

396           Overall, this contextual interpretation of the dominant traits comprising the RSV  
397 signature identified some peculiarities. Notably, the interferon response that, while  
398 robust, seemed to be somewhat muted when compared to other viral infections. More  
399 strikingly was the atypical overall elevation in the abundance levels associated with the  
400 erythrocyte signature. The extent of the observed change was only found in melanoma  
401 patients and liver transplant recipients: in these two cohorts, the erythrocyte signature

402 dominated the overall changes observed in the blood transcriptome. Notably, both  
403 patient populations relate to states characterized by marked immunosuppression, driven  
404 by the disease in the first case and pharmacological treatment aiming at maintaining  
405 graft tolerance in the other.

406

407 **Expression of transcripts constituting the A37/“erythrocyte” modular signature is**  
408 **restricted to a population of fetal GlyA+ erythroid cells**

409 In our final analyses, we focused our interpretations on the erythrocyte signature (A37).  
410 Although we had observed an association with RSV disease severity, we did not  
411 ascertain causality. Based on functional profiling results that were run using multiple  
412 approaches, we attributed the erythrocyte annotation to 8/11 modules in aggregate A37  
413 (interactive reports available via: <https://prezi.com/view/YyQs4WiXSNf0YXE79IfS/>).

414 Examining the abundance patterns for the transcripts comprising the A37 modules in  
415 reference datasets consisting in isolated leukocyte cell populations provided further  
416 insight (**Figure 9**; with additional heatmaps accessible interactively via the weblink  
417 provided above). In one such reference dataset contributed by Novershtern et al. (24),  
418 the expression of A37 transcripts was narrowly restricted to populations of glycoprotein  
419 A-positive (GlyA+) fetal erythroid cells. This pattern was irrespective of CD71 marker  
420 expression. However, genes comprising A37 modules were not expressed in CD71+ but  
421 GlyA- cells. We observed similar expression patterns for modules constituting  
422 aggregates A36 and A38, which both comprised one module functionally associated  
423 with the erythrocyte annotation (**Supplementary Figure 4, Supplementary Figure 5**)

424 Erythroid precursors of fetal origin can circulate in the blood of neonates for up to  
425 3-4 weeks following birth. Immunosuppressive properties have been attributed to these  
426 populations (25); for example, this cell population confers susceptibility to *Listeria*  
427 infection in neonates (26). However, a possible role for these circulating erythroid cells  
428 in the context of RSV infection has not been investigated to date. Others have also  
429 described the presence of an erythroid cell population with potent immunosuppressive  
430 properties associated with anemia in adults with late stage cancer (27). This finding is  
431 consistent with our observation of a prominent A37/erythrocyte signature in the  
432 melanoma patients included in our study.

433 Taken together, these observations support the notion that an increase in A37  
434 transcript abundance is associated with the presence of circulating erythroid cells.  
435 These cells might possess immunosuppressive properties and conceivably contribute to  
436 the worsening of RSV infection. While these findings might be particularly relevant to  
437 young infants, we also observed increases in adult subjects exposed experimentally to  
438 the virus (GSE73072: **Figure 1A, Supplementary Figure 1**).

439

## 440 **DISCUSSION**

441 This work has built on earlier studies investigating host responses to RSV via blood  
442 transcriptome profiling. The approach we adopted did not focus on identifying sets of  
443 classifiers or predictors. Rather, we primarily documented the inter-individual  
444 differences among this large consolidated set of patients.

445 Relying on highly reduced dimensions made it possible to define dominant blood  
446 transcriptome phenotypes among this aggregated RSV patient cohort. The four “traits”



447 or signatures that were retained included: interferon (A28 aggregate / IFN trait),  
448 inflammation (A35 / Infl), the cell cycle (A27 / CC) and erythrocytes (A37 / Ery). Out of  
449 319 RSV subjects, 199 were distributed in just eight phenotypes out of a possible 81.  
450 These dominant phenotypes were all positive for the interferon trait and positive or  
451 unchanged for the inflammation and cell cycle traits. The erythrocyte trait status ranged  
452 from being increased, unchanged and decreased.

453 From the standpoint of clinical significance, the phenotypes positive for both the  
454 interferon and erythrocyte traits were generally associated with a higher proportion of  
455 severe subjects. However, the levels of increase in abundance of interferon-inducible  
456 transcripts did not correlate with disease severity. Rather, erythrocyte transcripts  
457 showed the strongest association with infection severity. This finding confirmed the  
458 association previously described by Mejias et al., which was based on the analysis of  
459 one of the datasets comprised in this collection (28). We also observed an association,  
460 although to a lesser degree, between the level of increase of transcripts forming an  
461 inflammation signature (aggregate A35) and infection severity. Again, this finding is in  
462 line with previous data (9,10). Follow-up studies in large patient cohorts are now  
463 warranted to validate such classification scheme. Then, the number of traits needed for  
464 this classification to be clinically relevant must be determined. Thus far, our analysis  
465 suggests that the erythrocyte trait might constitute a valuable risk indicator if testing  
466 focuses on a narrowly defined age group (e.g. <4 months-of-age).

467 Our meta-analysis of available RSV blood transcriptome datasets also yielded  
468 several insights relevant to the immune biology of this disease. The interferon signature  
469 (A28 / "IFN" trait) is a hallmark of RSV infection and is observed in a wide range of other

470 viral and bacterial infections, as well as autoimmune diseases, as illustrated in the set of  
471 16 blood transcriptome datasets used in our interpretation. Our previous work has  
472 suggested that subsets of modules constituting this aggregate are preferentially induced  
473 by type I interferons [M8.1, M10.1 (19)]. Consistently, we also observed changes for  
474 these modules in patients with RSV infection (**supplementary Figure 3**). Others have  
475 also described robust interferon responses as measured via blood transcriptome  
476 profiling, in RSV patients (11). The role of type I interferons *per se* is not widely  
477 reported, but a recent study describes a dependency on interferon alpha and beta for  
478 developing antibody-mediated responses (29). Several reports, however, have identified  
479 suppressed interferon gamma responses in the context of RSV infection, especially  
480 when compared to the response observed during influenza virus infection (30–33). This  
481 finding is also consistent with our observation of a somewhat muted interferon response  
482 compared to what we measured in response to not only influenza, but also to HIV or TB  
483 infection, as well as in patients with SLE.

484 We propose that the inflammation signature (A35 / “Infl” trait) is associated with  
485 “neutrophil-driven” inflammation, given the preferential expression of its constitutive  
486 transcript in neutrophils and induction in patients with sepsis. This information is  
487 derived, in part, from a dataset contributed by Linsley et al. that comprised RNAseq  
488 profiles of isolated leukocyte fractions (34). The patterns of transcript abundance are  
489 available for the modules constituting aggregate A35 via an interactive web presentation  
490 (<https://prezi.com/view/7Q20FyW6Hrs5NjMaTUyW/>). This aggregate was the focus of a  
491 recent re-analysis we conducted in which an increase in abundance of A35 transcripts  
492 was a dominant feature of the psoriasis blood transcriptome fingerprint (35). We

493 hypothesized in turn that this inflammatory response might be driven more specifically  
494 by interleukin-17 (IL17). Indeed, several researchers have found a role for IL17 in the  
495 context of RSV infection (36,37) and in one instance specifically indicating the  
496 involvement of neutrophils in IL17-mediated antiviral responses (38).

497         We posit that the cell cycle signature (A27 / “CC” trait) is associated with the  
498 expansion of plasmablasts, which are responsible for antibody production. Indeed,  
499 modules in this aggregate comprised an overabundance of genes involved in the cell  
500 cycle, such as cyclins. One of the modules also comprises several genes expressed by  
501 plasmablasts (M12.15: CD38, IGJ, TNFRSF17) (39–41) that are markedly expressed  
502 between 7 and 14 days after the administration of trivalent influenza or pneumococcal  
503 vaccines (42). In the context of this study, changes in abundance of these markers was  
504 confirmed by flow cytometry to be correlated with the presence of these antibody  
505 producing cells. These levels also correlated with antibody titers measured four weeks  
506 post-vaccination. These cell populations are also expanded during the course of RSV  
507 infection. Habibi et al. reported a peak 10 days after experimental exposure to RSV and  
508 an correlation with the levels of neutralizing antibody developed by the individuals (43).

509         Consistent with our earlier findings (28), the erythrocyte signature (A37 / “Ery”  
510 trait) was most strongly associated with severity. However, such an association has not  
511 been reported in other studies comprising the consolidated dataset collection. We  
512 putatively link this signature with the presence of circulating erythroid cell precursors,  
513 based on the restriction of A37 transcripts in a reference transcriptome dataset to fetal  
514 erythroid cells (**Figure 9**). Erythroid precursors would normally be found in the bone  
515 marrow, but cells originating from the fetal liver do persist in infants in the circulation for

516 a few weeks after birth (44). In adults, extramedullary erythropoiesis is observed in the  
517 spleen and liver, and occurs under various circumstances, including anemia,  
518 pregnancy, severe infection or chronic stress (45,46). We hypothesize that circulating  
519 erythroid cells (CECs) associated with this signature might have immunosuppressive  
520 functions during an RSV infection. Thus, CEC-mediated immunosuppression would in  
521 turn drive a worsening of disease and severity in patients with RSV infection. This  
522 assertion is supported by various lines of evidence. First, Elahi et al. have described a  
523 wide range of mechanisms conferring immunosuppressive properties to this cell  
524 population, including via soluble factors (such as arginase, TGFbeta, reactive oxygen  
525 species) or cell surface receptors (such as PD1/PDL-1 and VISTA) (25). Second, we  
526 also observed a marked increase in A37 transcript abundance in metastatic melanoma  
527 and liver transplant recipients under maintenance therapy. Both of these states are  
528 characterized by marked immunosuppression and were categorized in the high  
529 abundance profile cluster for A37. Of the 14 other cohorts in this reference collection  
530 only RSV was present in this same cluster. Others have recently described  
531 immunosuppression exerted by CECs in patients with late stage cancer: these cells  
532 were found to be at least in part responsible for the impaired T-cell responses observed  
533 in this patient population (27). Third, the RSV literature provides indications of this virus'  
534 ability to subvert the immune response (4). While the possibility of an involvement of  
535 CECs in this immune modulation of the response to RSV is novel, the contribution of the  
536 hyporesponsiveness of the neonatal immune system as an underlying factor to  
537 progression to severe RSV infection has been clearly outlined (47). A key question  
538 could thus center on the possible contribution of CECs to the reduced competence of

539 the neonatal immune system. Indeed, results obtained by Elahi et al. in animal models  
540 indicate that CEC depletion can restore neonatal immune responsiveness and confer  
541 resistance to *Listeria* infection (26).

542 The synthesis that we conducted here builds upon and extends earlier findings. It  
543 also identifies new avenues of investigations. Notably, it points to the potential  
544 relevance of blood transcriptional phenotyping for stratification of patients with RSV  
545 infection. More specifically, a signature putatively attributed to immunosuppressive  
546 erythroid cells was found to be associated with clinical severity, even in homogenously  
547 younger patients. Clinical relevance of such candidate biomarker signature would need  
548 to be assessed next. Further investigation of circulating erythroid cells population in the  
549 context of RSV infection are also warranted by these findings. One of the central  
550 questions being whether these cells merely accompany clinical worsening of the  
551 disease or constitute one of its drivers. More generally, this work also highlights the  
552 need for follow on large-scale blood transcriptome profiling studies of responses to RSV  
553 patients, especially over multiple time points. Coordination and cooperation between the  
554 groups that may engage in such endeavors would also prove beneficial for generating  
555 large inter-operable blood transcriptome dataset collections.

556

## 557 **ACKNOWLEDGEMENTS**

558 This work is based in part on analyses conducted during a training workshop supported  
559 by Inflammation-Immunopathology-Biotherapy Department (i2B), AP-HP, Pitié-  
560 Salpêtrière Hospital, LabEx Transimmunom (ANR-11-IDEX-0004-02) and RHU iMAP  
561 grants to DK and organized with the help of Caroline Aheng and Sophie Miller. Sidra

562 Medicine is a member of the Qatar Foundation for Education, Science and Community  
563 Development. We would like to acknowledge Insight Editing London for editing the  
564 manuscript prior to submission.

565

566

## 567 **CONTRIBUTIONS**

568 Conceptualization: DR, DC, DB, EM, DK, MA. Data curation and validation: DR, MT,  
569 MG, BK, OK, SA, FM. Visualization: DR, DC, OK, SA, FM. Analysis and interpretation:  
570 DR, OK, SH, FM, AM, OR, EM, DK, DC. Writing of the first draft: DR, DC. Funding  
571 acquisition: DK, DC. Methodology development: DR, DC. Writing – review & editing:  
572 DR, MA, MT, MG, BK, OK, SH, FM, AM, OR, DB, EM, DK, DC. The contributor’s roles  
573 listed above follow the Contributor Roles Taxonomy (CRediT) managed by The  
574 Consortia Advancing Standards in Research Administration Information (CASRAI)  
575 (<https://casrai.org/credit/>).

576

## 577 **DECLARATIONS OF INTERESTS**

578 The authors declare no competing interests.

579

## 580 **FIGURE LEGENDS**

581 **Figure 1: Modular repertoire changes in patients with RSV infection vs uninfected**  
582 **controls.** A. Fingerprint heatmap comparing the module aggregate-level patterns of  
583 transcript abundance across six RSV datasets. The summarized module aggregate-  
584 level values on this heatmap are arranged in rows and the datasets in columns. The

585 datasets are grouped via hierarchical clustering, according to similarities in patterns of  
586 transcript abundance across module aggregates. B. Fingerprint grid for GSE77087.  
587 Modules are assigned a fixed position on the grid, with each row corresponding to a  
588 “module aggregate” constituted of modules following similar patterns of change in  
589 transcript abundance. The numbers of constitutive modules for each aggregate range  
590 from two (A16) to 42 (A2). Aggregates comprising a single module are not represented  
591 on this map (A9-A14; A19-A23). The percentage of constitutive transcripts for a given  
592 module showing an increase in abundance in RSV patients over controls is indicated by  
593 a red spot. The percentage of constitutive transcripts showing a decrease in abundance  
594 for a given module is indicated by a blue spot. The color key at the bottom indicates the  
595 functions that have been associated with some of the modules on the grid.

596

597 **Figure 2. Heatmap representation of changes in abundance of transcriptional**  
598 **modules across RSV infected individuals.** This heatmap was generated for the  
599 GSE77087 dataset that is also represented as a fingerprint grid plot in Figure 1B. The  
600 modules comprised in aggregates identified as being conserved (indicated by the  
601 colored triangles in Figure 1A) are arranged as rows and the RSV subjects comprised in  
602 this dataset are arranged as columns. The colored spots represent the percentage of  
603 transcripts within each module deemed to be differentially expressed (up = red, down =  
604 blue). The modules are arranged based on similarities in abundance patterns via  
605 hierarchical clustering within each aggregate. A general function is attributed to some of  
606 the aggregates, as indicated by the colored symbols and key.

607

608 **Figure 3: Individual subjects PCA plots and tSNE plots.** The modular fingerprint  
609 profiles of individual subjects from each of the six different studies were combined and  
610 PCA and tSNE plots were generated. The total number of subjects was 490 (319  
611 subjects with RSV infection and 171 controls). **A.** 2D PCA plots. The subjects are color-  
612 coded according to grouping information (Groups) and dataset membership (Studies).  
613 **B.** tSNE plots. In both types of plot, each sample is represented by a dot. The proximity  
614 between the dots is an indication of the modular transcriptional profile similarity.

615  
616 **Figure 4: Stratification of RSV patients according to blood transcriptome**  
617 **phenotypes.** Phenotypes were defined according to four different “traits”. Each of the  
618 319 RSV patients comprising the consolidated cohort used in this meta-analysis were  
619 assigned to a phenotype according to their status for each of the four traits: positive  
620 (red), negative (blue) or unchanged (white). This determination was made in reference  
621 to each respective control baseline. The bar graph shows the number of patients  
622 assigned to each of the phenotypes. The gray line indicates the threshold used to select  
623 the phenotypes considered to be the most abundant (> 10 subjects).

624  
625 **Figure 5: The association of dominant RSV blood transcriptional phenotypes with**  
626 **clinical and demographic attributes.** Heatmaps were generated for the seven most  
627 prevalent phenotypes identified on the distribution plot in Figure 4. The subjects (rows)  
628 were first arranged according to their phenotype, and then arranged within each  
629 phenotype according to similarities in abundance patterns. Modules constituting the four  
630 aggregates selected for the definition of molecular phenotypes are shown as columns.



631 The respective traits for module aggregates A28, A35, A27 and A37 are IFN  
632 (interferon), Infl (inflammation), CC (cell cycle) and Ery (Erythrocytes). The status for  
633 each phenotype is indicated by a red, blue or white spot (increase, decrease or no  
634 change, respectively). The concentric circle plots (right) indicate the distribution of  
635 patients constituting each phenotype according to age, study membership and RSV  
636 severity status.

637

638 **Figure 6: The association of dominant RSV blood transcriptional phenotypes with**  
639 **disease severity as a function of age.** A. The relative frequencies of patients in PICU  
640 care across dominant IFN/Infl/CC/Ery phenotypes. Bottom panel: the red or blue spots  
641 define the status for four traits corresponding to the eight most prevalent RSV  
642 phenotypes identified in Figure 4 (>10 subjects). Middle panel: the relative frequency of  
643 subjects cared for in the hospital ward, PICU, outpatients, and experimentally exposed  
644 subjects. This information was not available for all studies. Top panel: the relative  
645 contribution of the different datasets selected for this meta-analysis. The combination of  
646 tables and graphs on the left is for all subjects. Information for a subset of subjects <4  
647 months-of-age is shown on the right. B. Ages according to Ery trait status for all patients  
648 and a subset aged <4 months old. The box plots represent the age in months of  
649 individuals comprising the consolidated RSV cohort used throughout this study. Patients  
650 were categorized according to their Ery trait status. The plot on the right shows the  
651 same information but of a subset of patients <4 months old. Dots are color-coded  
652 according to severity status (Red = PICU, Blue = ward, Yellow = outpatient). \*  $p < 0.05$ ,  
653 \*\*  $p < 0.01$ , \*\*\*  $p < 0.001$ .

654

655 **Figure 7: Association of blood transcriptomic traits with RSV disease severity in**  
656 **infants < 4 month of age.** Box plots (left) show levels of transcript abundance  
657 measured for individual subjects for a given aggregate. This value represents the  
658 percentage of transcripts constituting the aggregate that are increased or decreased for  
659 an individual compared to the median of the uninfected control group (+100% = all  
660 transcripts are increased; -100% = all transcripts are decreased). Individuals are  
661 grouped according to health status: uninfected controls, inpatients cared for in the  
662 hospital ward or inpatients cared for in the PICU. \*  $p < 0.05$ , \*\*  $p < 0.01$ , \*\*\*  $p < 0.001$ .

663

664 The “Signature survival” curves (right) represent the relative frequency of subjects (y-  
665 axis) for whom the percentage response falls at or above a given threshold (x-axis). The  
666 percentage response was calculated in the same manner as described for the box plot.  
667 Thus, all subjects would have a percentage of response falling between -100% and  
668 +100%, as indicated by the curves showing the frequency values of 1 at  $x = -100\%$ . As  
669 the range narrows, the frequency decreases; in most cases a very small proportion of  
670 patients have a percentage of response values falling between +90% and +100% (at  $x =$   
671 +90%). The separation of the curves is an indication of the differences in the distribution  
672 of percentage responses between groups (pale blue = control, dark blue = ward, red =  
673 PICU).

674

675 **Figure 8: Contextual interpretation of RSV blood transcriptome fingerprints** A.  
676 Fingerprint grid plots displaying changes in the levels of transcript abundance in

677 patients with RSV infection, Influenza infection, Systemic Lupus Erythematosus, stage  
678 IV melanoma or in liver transplant recipients. The visualization scheme is similar to the  
679 one described for the fingerprint grid plot in Figure 1B. The four traits used to  
680 molecularly stratify RSV patients are highlighted. Because the position of the modules  
681 on the grid is fixed, the color key from Figure 1 can also be used for functional  
682 interpretation of the modules from the other rows. The datasets on which the fingerprint  
683 maps are based are publicly available under GEO accession ID GSE100150. B.  
684 Heatmaps displaying the changes in transcript abundance for modules belonging to four  
685 aggregates (columns) across 16 reference datasets. As for the grid plots, an increase  
686 and decrease in the abundance of transcripts constituting these modules are shown by  
687 a red or blue spot, respectively. The rows (datasets from each disease cohort) and  
688 columns (modules) were arranged by hierarchical clustering based on similarities in  
689 patterns of transcript abundance. All the plots can be generated and exported via a web  
690 application: [https://drinchai.shinyapps.io/dc\\_gen3\\_module\\_analysis/#](https://drinchai.shinyapps.io/dc_gen3_module_analysis/#) video  
691 demonstration [https://youtu.be/y\\_7xKJo5e4](https://youtu.be/y_7xKJo5e4).

692

693 **Figure 9: Expression levels of A37 genes across cell populations isolated from**  
694 **human peripheral blood and cord blood.** The abundance levels of transcripts  
695 comprised in the 11 modules constituting A37 (columns) across blood-cell populations  
696 (rows). The dataset is publicly available under GEO accession ID GSE24759 (24). The  
697 populations are separated based on whether they were isolated from adult venous  
698 blood (top) or from neonate cord blood (bottom). Distinct erythroid cell populations

699 isolated on the basis of cell surface expression of CD34, CD71 and GlyA antigens are  
700 also shown.

701

702 **Supplementary Figure 1: Fingerprint grid maps of modular repertoire changes in**  
703 **six independent RSV blood transcriptome datasets.** The visualization scheme is  
704 similar to the one described for the fingerprint grid map in Figure 1B. Because the  
705 position of the modules on the grid is fixed, the color key from Figure 1 can also be used  
706 for functional interpretation. The maps were generated from multiple independent RSV  
707 blood transcriptome datasets that are available in the NCBI Gene Expression Omnibus  
708 (5, 6, 20–22, 28).

709

710 **Supplementary Figure 2: Inter-individual variance of summarized module-level**  
711 **abundance values.** The variance in the percentage of the transcript response across  
712 319 RSV patients was calculated across 382 modules. The box plots display those  
713 values with each module being grouped in its respective module aggregate, from A1 to  
714 A38.

715

716 **Supplementary Figure 3: Patterns of abundance of six A28 modules across**  
717 **several disease and physiological states.** Each column on the heatmap corresponds  
718 to one of six modules constituting the A28 aggregate. Each row corresponds to one of  
719 16 reference datasets. Red spots on the heatmap indicate an increase in abundance of  
720 the transcripts constituting a given module for a given dataset. A blue spot indicates a  
721 decrease in abundance. No color indicates no change. Disease or physiological states

722 were arranged based on similarity in patterns of aggregate activity. The circle (top left)  
723 is a representation of the six modules constituting aggregate 28, and of the transcripts  
724 constituting each of the modules. Some genes on the Illumina BeadArrays can map to  
725 multiple probes, which explains the few instances where the same gene can be found in  
726 different modules. The smaller circles (right) represent changes in transcript abundance  
727 of individual transcripts for two of the disease clusters. The first cluster (red arrow)  
728 comprises four diseases with the highest degree of increase in transcript abundance.  
729 The second cluster (orange arrow) comprises five diseases with an intermediate level of  
730 increase in abundance. The insert (bottom) shows two circles representing changes in  
731 abundance in patients with hepatitis C treated with IFN $\alpha$  (51), and patients with multiple  
732 sclerosis treated with IFN $\beta$  (52). The corresponding NCBI GEO accession IDs are  
733 indicated for each.

734

735 **Supplementary Figure 4: The expression levels of A36 genes across the cell**  
736 **populations isolated from human peripheral blood and cord blood.** The abundance  
737 levels of transcripts comprised in the 11 modules constituting aggregate A36 (columns)  
738 across blood cell populations (rows). The dataset is publicly available under GEO  
739 accession ID GSE24759 (24). The populations are separated based on whether they  
740 were isolated from adult venous blood (top) or from neonate cord blood (bottom).  
741 Distinct erythroid cell populations isolated on the basis of cell surface expression of  
742 CD34, CD71 and GlyA antigens are shown.

743

744 **Supplementary Figure 5: The expression levels of A38 genes across the cell**  
 745 **populations isolated from human peripheral blood and cord blood.** The abundance  
 746 levels of transcripts comprised in the 11 modules constituting aggregate A38 (columns)  
 747 across blood cell populations (rows). The dataset is publicly available under GEO  
 748 accession ID GSE24759 (24). The populations are separated based on whether they  
 749 were isolated from adult venous blood (top) or from neonate cord blood (bottom).  
 750 Distinct erythroid cell populations isolated on the basis of cell surface expression of  
 751 CD34, CD71 and GlyA antigens are shown.

752  
 753  
 754  
 755  
 756  
 757

## 758 TABLES

759  
 760 **Table 1: Description of the public RSV blood transcriptome datasets.**

761

| GEO ID          | Reference                         | Title                                                                                                                             | N Subjects                | Age demographics | Sample type           | Platform                    | Cluster # (Figure 1A) |
|-----------------|-----------------------------------|-----------------------------------------------------------------------------------------------------------------------------------|---------------------------|------------------|-----------------------|-----------------------------|-----------------------|
| <b>GSE42026</b> | Herberg et al. / 23901082 / (20)  | Transcriptomic profiling in childhood H1N1/09 influenza reveals reduced expression of protein synthesis genes                     | 22 RSV & 33 controls      | Pediatric        | Whole blood (PaxGene) | Illumina HumanHT-12 V3.0    | 1                     |
| <b>GSE38900</b> | Mejias et al. / 24265599 / (28)   | Genome-wide analysis of whole blood transcriptional response to RSV, Influenza and Rhinovirus (LRTI) in children                  | 107 RSV & 31 controls     | Pediatric        | Whole blood (Tempus)  | Illumina Human HT-12 V3.0 ] | 1                     |
| <b>GSE80179</b> | McDonald et al. / 27822537 / (22) | A simple screening approach to prioritize genes for functional analysis identifies a role for IRF7 in the control of RSV disease. | 27 RSV & 52 controls      | Pediatric        | Whole blood (PaxGene) | Illumina HumanHT-12 V4.0    | 1                     |
| <b>GSE73072</b> | Liu et al. / 26801061 / (21)      | Host gene expression signatures of H1N1,                                                                                          | 20 subjects 2 time points | Adult            | Whole blood (PaxGene) | Affymetrix GeneChip Human   | 2                     |

|                  |                                                 |                                                                                                   |                      |           |                      |                          |   |
|------------------|-------------------------------------------------|---------------------------------------------------------------------------------------------------|----------------------|-----------|----------------------|--------------------------|---|
|                  |                                                 | H3N2, HRV, RSV virus infection in adults                                                          |                      |           |                      | Genome U133A 2.0 Array   |   |
| <b>GSE77087</b>  | de Steenhuijsen Pijters et al. / 27135599 / (6) | Nasopharyngeal microbiota, host transcriptome and disease severity in children with RSV infection | 81 RSV & 23 controls | Pediatric | Whole blood (Tempus) | Illumina HumanHT-12 V4.0 | 2 |
| <b>GSE103842</b> | Rodriguez-Fernandez et al. / 29045741 / (5)     | RSV Genotypes and Disease Severity in Young Children Hospitalized with Bronchiolitis              | 62 RSV & 12 controls | Pediatric | Whole blood (Tempus) | Illumina HumanHT-12 V4.0 | 2 |

762  
763  
764  
765  
766  
767  
768  
769  
770  
771  
772  
773  
774

RSV: respiratory syncytial virus, LRTI: lower respiratory tract infection

**Table 2: Links to module aggregates annotation pages**

| Aggregate | Function                  | Links                                                                                                   |
|-----------|---------------------------|---------------------------------------------------------------------------------------------------------|
| A1        | Lymphocytic               | <a href="https://prezi.com/view/sxap39tKxkmCNTNIIVO/">https://prezi.com/view/sxap39tKxkmCNTNIIVO/</a>   |
| A2        | TBD                       | <a href="https://prezi.com/view/96GWajx5mZjuRS4B6gjA/">https://prezi.com/view/96GWajx5mZjuRS4B6gjA/</a> |
| A3        | TBD                       | <a href="https://prezi.com/view/OWFVI51FND0WwWNgsgJZ/">https://prezi.com/view/OWFVI51FND0WwWNgsgJZ/</a> |
| A4        | TBD                       | <a href="https://prezi.com/view/2Zbq8ZDYbO4hbUd4r2KF/">https://prezi.com/view/2Zbq8ZDYbO4hbUd4r2KF/</a> |
| A5        | Lymphocytic               | <a href="https://prezi.com/view/62tgA5E6roOlk5DRNvS1/">https://prezi.com/view/62tgA5E6roOlk5DRNvS1/</a> |
| A6        | Lymphocytic               | <a href="https://prezi.com/view/Uks2Nd4lvizNNFVptBEy/">https://prezi.com/view/Uks2Nd4lvizNNFVptBEy/</a> |
| A7        | TBD                       | <a href="https://prezi.com/view/kKfergNj0SkLXyFtm0Dg/">https://prezi.com/view/kKfergNj0SkLXyFtm0Dg/</a> |
| A8        | TBD                       | <a href="https://prezi.com/view/Y4uk1RPJyNcSndJYnFX6/">https://prezi.com/view/Y4uk1RPJyNcSndJYnFX6/</a> |
| A9        | TBD                       | <a href="https://prezi.com/view/jgYehQ9QhyADAttEsdol/">https://prezi.com/view/jgYehQ9QhyADAttEsdol/</a> |
| A15       | TBD                       | <a href="https://prezi.com/view/jgYehQ9QhyADAttEsdol/">https://prezi.com/view/jgYehQ9QhyADAttEsdol/</a> |
| A16       | TBD                       | <a href="https://prezi.com/view/SKzHeA0XYdLYvy2sY8gP/">https://prezi.com/view/SKzHeA0XYdLYvy2sY8gP/</a> |
| A17       | TBD                       | <a href="https://prezi.com/view/FS7sE1Vqew5g8EKOM1AM/">https://prezi.com/view/FS7sE1Vqew5g8EKOM1AM/</a> |
| A18       | TBD                       | <a href="https://prezi.com/view/aZMLfIMNVrV7JnValILm/">https://prezi.com/view/aZMLfIMNVrV7JnValILm/</a> |
| A24       | Oxidative phosphorylation | <a href="https://prezi.com/view/eiXvf2LNBLFRgrtaeCuM/">https://prezi.com/view/eiXvf2LNBLFRgrtaeCuM/</a> |
| A25       | TBD                       | <a href="https://prezi.com/view/pwyojaU62Z7GT102ZYwM/">https://prezi.com/view/pwyojaU62Z7GT102ZYwM/</a> |
| A26       | TBD                       | <a href="https://prezi.com/view/9CErpW3NwpN2HgRS3Hzf/">https://prezi.com/view/9CErpW3NwpN2HgRS3Hzf/</a> |
| A27       | Cell cycle                | <a href="https://prezi.com/view/GgliA0K9kSFHbpVj2I85/">https://prezi.com/view/GgliA0K9kSFHbpVj2I85/</a> |

|     |              |                                                                                                         |
|-----|--------------|---------------------------------------------------------------------------------------------------------|
| A28 | Interferon   | <a href="https://prezi.com/view/E34MhxE5uKoZLWZ3KXjG/">https://prezi.com/view/E34MhxE5uKoZLWZ3KXjG/</a> |
| A29 | TBD          | <a href="https://prezi.com/view/W4TShTd32dEjx0XPOF1U/">https://prezi.com/view/W4TShTd32dEjx0XPOF1U/</a> |
| A30 | TBD          | <a href="https://prezi.com/view/kl7VHoJTWug0sn7TgXut/">https://prezi.com/view/kl7VHoJTWug0sn7TgXut/</a> |
| A31 | TBD          | <a href="https://prezi.com/view/GqtUO22JJISf16zMJkBB/">https://prezi.com/view/GqtUO22JJISf16zMJkBB/</a> |
| A32 | TBD          | <a href="https://prezi.com/view/qlbG9VFzegOndQKD8aiy/">https://prezi.com/view/qlbG9VFzegOndQKD8aiy/</a> |
| A33 | Inflammation | <a href="https://prezi.com/view/VBqKqHuLWCra3OJOIZRR/">https://prezi.com/view/VBqKqHuLWCra3OJOIZRR/</a> |
| A34 | TBD          | <a href="https://prezi.com/view/HcSglEGP3TjTSpaPCxv/">https://prezi.com/view/HcSglEGP3TjTSpaPCxv/</a>   |
| A35 | Inflammation | <a href="https://prezi.com/view/7Q20FyW6Hrs5NjMaTUyW/">https://prezi.com/view/7Q20FyW6Hrs5NjMaTUyW/</a> |
| A36 | Erythroid    | <a href="https://prezi.com/view/M7dnztl2h61gXrKFQeB2/">https://prezi.com/view/M7dnztl2h61gXrKFQeB2/</a> |
| A37 | Erythroid    | <a href="https://prezi.com/view/YyQs4WiXSNf0YXE79Ifs/">https://prezi.com/view/YyQs4WiXSNf0YXE79Ifs/</a> |
| A38 | Erythroid    | <a href="https://prezi.com/view/0KUIPICKUZGeUjb206R5/">https://prezi.com/view/0KUIPICKUZGeUjb206R5/</a> |

775

776

777

778

779

## 780 **METHODS**

### 781 **Selection of public blood transcriptome datasets**

782 Datasets deposited in the NCBI Gene Expression Omnibus, GEO, were used in this  
783 meta-analysis. Accession IDs along with descriptive information and references can be  
784 found in **Table 1**. A reference dataset, which consisted of transcriptome profiles derived  
785 from adult blood cell populations and cord blood was also used to support the functional  
786 interpretation of our findings. This dataset was contributed to the GEO by Novershtern  
787 et al. with accession ID GSE24759 (24).

788

### 789 **Module repertoire construction**

790 The construction of a transcriptional module repertoire for blood transcriptome analyses  
791 has been described previously (48,49). The version that was used in this study is the



792 third one developed by our group and is the object of a separate publication (available  
793 on a pre-print server (19)). Briefly, the approach consists of identifying sets of co-  
794 expressed transcripts for a given biological system (in this case blood) and across a  
795 wide range of disease or physiological states (perturbations of steady state). In this  
796 case, co-expression was determined based on patterns of co-clustering observed for all  
797 gene pairs across a collection of 16 reference datasets. These datasets encompassed  
798 viral and bacterial infectious diseases (HIV, influenza, RSV, Melioidosis,  
799 *Staphylococcus aureus*, Tuberculosis) as well as several inflammatory or autoimmune  
800 diseases (systemic lupus erythematosus, multiple sclerosis, chronic obstructive  
801 pulmonary disease, Kawasaki disease, juvenile dermatomyositis, systemic onset  
802 juvenile idiopathic arthritis), B-cell deficiency, liver transplantation, stage IV melanoma  
803 and pregnancy. The overall collection comprised 985 blood transcriptome profiles. A  
804 weighted co-expression network was built on the basis of co-clustering patterns that  
805 were obtained. Here, the weight of the nodes connecting a gene pair being based on  
806 the number of times co-clustering was observed, thus ranging from a weight of 1 (where  
807 co-clustering occurs in one of 16 datasets) to a weight of 16 (where co-clustering occurs  
808 in all 16 datasets). Next, this network was mined using a graph theory algorithm  
809 (identification of cliques and paracliques) to define a subset of densely connected gene  
810 sets that constituted our module repertoire. Overall, 382 modules were identified via this  
811 process, encompassing 14,168 transcripts. A supplemental file including the definition  
812 of this module repertoire along with the functional annotations is available from a  
813 companion publication.

814

## 815 **Constitution of module aggregates**

816 To maintain the number of variables within a manageable number and to facilitate data  
817 interpretation, a second tier of clustering was performed to group the modules into  
818 “aggregates”. This was achieved by segregating the set of 382 modules according to  
819 the patterns of transcript abundance across the 16 reference datasets that were used  
820 for module construction. This segregation resulted in the formation of 38 aggregates,  
821 each comprising between one and 42 modules. The second level of granularity that was  
822 thus obtained was used to define distinct RSV blood transcriptome phenotypes and as a  
823 basis for the fingerprint grid plot representation (see **Figure 1** and **Figure 7**). With such  
824 grids, the first vertical reading of the fingerprint grid provides an overview of the  
825 changes in transcript abundance observed among module aggregates, while the  
826 horizontal reading provides the changes observed within an aggregate and across  
827 modules.

828

## 829 **Module repertoire analysis workflow**

830 The modular analysis was performed using 14,168 transcripts. The fold change was  
831 computed using gene expression data prior to log<sub>2</sub> transformation. For group  
832 comparisons, a paired t-test was performed on the log<sub>2</sub>-transformed data [Fold change  
833 (FC) cut off = 1.5; FDR cut off = 0.1]. For individual-patients analyses, each sample was  
834 compared to the mean value of control samples in each dataset. The cut off comprised  
835 an absolute FC >1.5 and a difference in gene expression level >10. The results for each  
836 module analysis are reported as the percentage of its constitutive transcripts for which  
837 the abundance was increased or decreased. Because gene sets are selected based on

838 the co-expression observed in blood, the changes in abundance within a given module  
839 tend to be coordinated and the dominant trend is therefore selected (the greater value  
840 of the percentage increased vs percentage decreased). A module was considered to be  
841 “responsive” when the proportion of differentially expressed transcripts (as defined  
842 above) was >15%.

843

#### 844 **Data visualization**

845 The results were visualized in a fingerprint format, either as a grid plot (group level,  
846 **Figure 1**) or as a heatmap (individual level, **Figure 5**), using the same illustrative RSV  
847 dataset. For each module, the percentage of increased transcripts is represented by a  
848 red spot and the percentage of decreased transcripts is represented by a blue spot. The  
849 largest of the two values was retained for visualization. In the grid format (**Figure 1**), the  
850 position of each module is fixed. A row of modules corresponds to a “module  
851 aggregate”, which as described above, is a set of modules following a similar pattern of  
852 activity across the 16 input datasets corresponding to different disease or physiological  
853 states. A few “aggregates” comprised only a single module and thus are not shown on  
854 the grid. The fingerprint grid plots were generated using “ComplexHeatmap” (50).

855 For the heatmaps (**Figure 2, Figure 5, Figure 7B**), each row corresponds to a module  
856 and each column to a sample. The columns and rows are arranged based on  
857 similarities in the patterns of module activity. Filters can be applied to remove modules  
858 that show only low levels of activity across the samples or to retain only the modules  
859 associated with functional annotations.

860

## 861 REFERENCES

- 862 1. Shi T, McAllister DA, O'Brien KL, Simoes EAF, Madhi SA, Gessner BD, et al. Global, regional,  
863 and national disease burden estimates of acute lower respiratory infections due to  
864 respiratory syncytial virus in young children in 2015: a systematic review and modelling  
865 study. *Lancet*. 2017 Sep 2;390(10098):946–58.
- 866 2. Hall CB, Weinberg GA, Iwane MK, Blumkin AK, Edwards KM, Staat MA, et al. The burden of  
867 respiratory syncytial virus infection in young children. *N Engl J Med*. 2009 Feb  
868 5;360(6):588–98.
- 869 3. García CG, Bhore R, Soriano-Fallas A, Trost M, Chason R, Ramilo O, et al. Risk factors in  
870 children hospitalized with RSV bronchiolitis versus non-RSV bronchiolitis. *Pediatrics*. 2010  
871 Dec;126(6):e1453-1460.
- 872 4. Ascough S, Paterson S, Chiu C. Induction and Subversion of Human Protective Immunity:  
873 Contrasting Influenza and Respiratory Syncytial Virus. *Front Immunol*. 2018;9:323.
- 874 5. Rodriguez-Fernandez R, Tapia LI, Yang C-F, Torres JP, Chavez-Bueno S, Garcia C, et al.  
875 Respiratory Syncytial Virus Genotypes, Host Immune Profiles, and Disease Severity in  
876 Young Children Hospitalized With Bronchiolitis. *J Infect Dis*. 2017 27;217(1):24–34.
- 877 6. de Steenhuijsen Piters WAA, Heinonen S, Hasrat R, Bunsow E, Smith B, Suarez-Arrabal M-  
878 C, et al. Nasopharyngeal Microbiota, Host Transcriptome, and Disease Severity in Children  
879 with Respiratory Syncytial Virus Infection. *Am J Respir Crit Care Med*. 2016  
880 01;194(9):1104–15.
- 881 7. Mejias A, Dimo B, Suarez NM, Garcia C, Suarez-Arrabal MC, Jartti T, et al. Whole blood  
882 gene expression profiles to assess pathogenesis and disease severity in infants with  
883 respiratory syncytial virus infection. *PLoS Med*. 2013 Nov;10(11):e1001549.
- 884 8. McClain MT, Park LP, Nicholson B, Veldman T, Zaas AK, Turner R, et al. Longitudinal  
885 analysis of leukocyte differentials in peripheral blood of patients with acute respiratory  
886 viral infections. *J Clin Virol*. 2013 Dec;58(4):689–95.
- 887 9. Do LAH, Pellet J, van Doorn HR, Tran AT, Nguyen BH, Tran TTL, et al. Host Transcription  
888 Profile in Nasal Epithelium and Whole Blood of Hospitalized Children Under 2 Years of Age  
889 With Respiratory Syncytial Virus Infection. *J Infect Dis*. 2017 27;217(1):134–46.
- 890 10. Brand HK, Ahout IML, de Ridder D, van Diepen A, Li Y, Zaalberg M, et al. Olfactomedin 4  
891 Serves as a Marker for Disease Severity in Pediatric Respiratory Syncytial Virus (RSV)  
892 Infection. *PLoS ONE*. 2015;10(7):e0131927.
- 893 11. Bucacas KL, Mian AI, Demmler-Harrison GJ, Caviness AC, Piedra PA, Franco LM, et al.  
894 Global gene expression profiling in infants with acute respiratory syncytial virus

- 895 broncholitis demonstrates systemic activation of interferon signaling networks. *Pediatr*  
896 *Infect Dis J.* 2013 Feb;32(2):e68-76.
- 897 12. Fjaerli H-O, Bukholm G, Krog A, Skjaeret C, Holden M, Nakstad B. Whole blood gene  
898 expression in infants with respiratory syncytial virus bronchiolitis. *BMC Infect Dis.* 2006  
899 Dec 13;6:175.
- 900 13. Tsalik EL, Henao R, Nichols M, Burke T, Ko ER, McClain MT, et al. Host gene expression  
901 classifiers diagnose acute respiratory illness etiology. *Sci Transl Med.* 2016 Jan  
902 20;8(322):322ra11.
- 903 14. Banchereau R, Cepika A-M, Banchereau J, Pascual V. Understanding Human Autoimmunity  
904 and Autoinflammation Through Transcriptomics. *Annu Rev Immunol.* 2017 26;35:337–70.
- 905 15. Chaussabel D. Assessment of immune status using blood transcriptomics and potential  
906 implications for global health. *Semin Immunol.* 2015 Feb;27(1):58–66.
- 907 16. Sweeney TE, Haynes WA, Vallania F, Ioannidis JP, Khatri P. Methods to increase  
908 reproducibility in differential gene expression via meta-analysis. *Nucleic Acids Res.* 2017  
909 09;45(1):e1.
- 910 17. Sweeney TE, Perumal TM, Henao R, Nichols M, Howrylak JA, Choi AM, et al. A community  
911 approach to mortality prediction in sepsis via gene expression analysis. *Nat Commun.* 2018  
912 15;9(1):694.
- 913 18. Schaack D, Siegler BH, Tamulyte S, Weigand MA, Uhle F. The immunosuppressive face of  
914 sepsis early on intensive care unit-A large-scale microarray meta-analysis. *PLoS ONE.*  
915 2018;13(6):e0198555.
- 916 19. Altman MC, Rinchai D, Baldwin N, Whalen E, Garand M, Kabeer BA, et al. A Novel  
917 Repertoire of Blood Transcriptome Modules Based on Co-expression Patterns Across  
918 Sixteen Disease and Physiological States. *bioRxiv.* 2019 Jan 23;525709.
- 919 20. Herberg JA, Kaforou M, Gormley S, Sumner ER, Patel S, Jones KDJ, et al. Transcriptomic  
920 profiling in childhood H1N1/09 influenza reveals reduced expression of protein synthesis  
921 genes. *J Infect Dis.* 2013 Nov 15;208(10):1664–8.
- 922 21. Liu T-Y, Burke T, Park LP, Woods CW, Zaas AK, Ginsburg GS, et al. An individualized  
923 predictor of health and disease using paired reference and target samples. *BMC*  
924 *Bioinformatics.* 2016 Jan 22;17:47.
- 925 22. McDonald JU, Kaforou M, Clare S, Hale C, Ivanova M, Huntley D, et al. A Simple Screening  
926 Approach To Prioritize Genes for Functional Analysis Identifies a Role for Interferon  
927 Regulatory Factor 7 in the Control of Respiratory Syncytial Virus Disease. *mSystems.* 2016  
928 Jun;1(3).

- 929 23. Maaten L van der, Hinton G. Visualizing Data using t-SNE. *Journal of Machine Learning*  
930 *Research*. 2008;9(Nov):2579–605.
- 931 24. Novershtern N, Subramanian A, Lawton LN, Mak RH, Haining WN, McConkey ME, et al.  
932 Densely interconnected transcriptional circuits control cell states in human hematopoiesis.  
933 *Cell*. 2011 Jan 21;144(2):296–309.
- 934 25. Elahi S. Neglected Cells: Immunomodulatory Roles of CD71+ Erythroid Cells. *Trends*  
935 *Immunol*. 2019 Mar;40(3):181–5.
- 936 26. Elahi S, Ertelt JM, Kinder JM, Jiang TT, Zhang X, Xin L, et al. Immunosuppressive CD71+  
937 erythroid cells compromise neonatal host defence against infection. *Nature*. 2013 Dec  
938 5;504(7478):158–62.
- 939 27. Zhao L, He R, Long H, Guo B, Jia Q, Qin D, et al. Late-stage tumors induce anemia and  
940 immunosuppressive extramedullary erythroid progenitor cells. *Nat Med*.  
941 2018;24(10):1536–44.
- 942 28. Mejias A, Dimo B, Suarez NM, Garcia C, Suarez-Arrabal MC, Jartti T, et al. Whole blood  
943 gene expression profiles to assess pathogenesis and disease severity in infants with  
944 respiratory syncytial virus infection. *PLoS Med*. 2013 Nov;10(11):e1001549.
- 945 29. Jans J, Pettengill M, Kim D, van der Made C, de Groot R, Henriët S, et al. Human newborn B  
946 cells mount an interferon- $\alpha/\beta$  receptor-dependent humoral response to respiratory  
947 syncytial virus. *J Allergy Clin Immunol*. 2017;139(6):1997-2000.e4.
- 948 30. Roberts NJ, Hiscott J, Signs DJ. The limited role of the human interferon system response  
949 to respiratory syncytial virus challenge: analysis and comparison to influenza virus  
950 challenge. *Microb Pathog*. 1992 Jun;12(6):409–14.
- 951 31. Aberle JH, Aberle SW, Dworzak MN, Mandl CW, Rebhandl W, Vollnhofer G, et al. Reduced  
952 interferon-gamma expression in peripheral blood mononuclear cells of infants with severe  
953 respiratory syncytial virus disease. *Am J Respir Crit Care Med*. 1999 Oct;160(4):1263–8.
- 954 32. Aberle JH, Aberle SW, Rebhandl W, Pracher E, Kundi M, Popow-Kraupp T. Decreased  
955 interferon-gamma response in respiratory syncytial virus compared to other respiratory  
956 viral infections in infants. *Clin Exp Immunol*. 2004 Jul;137(1):146–50.
- 957 33. Schauer U, Hoffjan S, Rothoëft T, Bartz H, König S, Fuchs E, et al. Severe respiratory  
958 syncytial virus infections and reduced interferon-gamma generation in vitro. *Clin Exp*  
959 *Immunol*. 2004 Oct;138(1):102–9.
- 960 34. Linsley PS, Speake C, Whalen E, Chaussabel D. Copy number loss of the interferon gene  
961 cluster in melanomas is linked to reduced T cell infiltrate and poor patient prognosis. *PLoS*  
962 *ONE*. 2014;9(10):e109760.

- 963 35. Rawat A, Rinchai D, Toufiq M, Marr A, Kino T, Garand M, et al. A neutrophil-driven  
964 inflammatory signature characterizes the blood cell transcriptome fingerprints of Psoriasis  
965 and Kawasaki Disease. *bioRxiv*. 2020 Feb 25;2020.02.24.962621.
- 966 36. Bera MM, Lu B, Martin TR, Cui S, Rhein LM, Gerard C, et al. Th17 cytokines are critical for  
967 respiratory syncytial virus-associated airway hyperresponsiveness through regulation by  
968 complement C3a and tachykinins. *J Immunol*. 2011 Oct 15;187(8):4245–55.
- 969 37. Mebratu YA, Tesfaigzi Y. IL-17 Plays a Role in Respiratory Syncytial Virus-induced Lung  
970 Inflammation and Emphysema in Elastase and LPS-injured Mice. *Am J Respir Cell Mol Biol*.  
971 2018;58(6):717–26.
- 972 38. Zhang G, Zhou KF, Lu ZH. Interleukin-17 enhances the removal of respiratory syncytial  
973 virus in mice by promoting neutrophil migration and reducing interferon-gamma  
974 expression. *Genet Mol Res*. 2016 Mar 24;15(1).
- 975 39. Cole S, Walsh A, Yin X, Wechalekar MD, Smith MD, Proudman SM, et al. Integrative  
976 analysis reveals CD38 as a therapeutic target for plasma cell-rich pre-disease and  
977 established rheumatoid arthritis and systemic lupus erythematosus. *Arthritis Res Ther*.  
978 2018 02;20(1):85.
- 979 40. Lin P, Owens R, Tricot G, Wilson CS. Flow cytometric immunophenotypic analysis of 306  
980 cases of multiple myeloma. *Am J Clin Pathol*. 2004 Apr;121(4):482–8.
- 981 41. Owczarczyk K, Lal P, Abbas AR, Wolslegel K, Holweg CTJ, Dummer W, et al. A plasmablast  
982 biomarker for nonresponse to antibody therapy to CD20 in rheumatoid arthritis. *Sci Transl*  
983 *Med*. 2011 Sep 21;3(101):101ra92.
- 984 42. Obermoser G, Presnell S, Domico K, Xu H, Wang Y, Anguiano E, et al. Systems scale  
985 interactive exploration reveals quantitative and qualitative differences in response to  
986 influenza and pneumococcal vaccines. *Immunity*. 2013 Apr 18;38(4):831–44.
- 987 43. Habibi MS, Jozwik A, Makris S, Dunning J, Paras A, DeVincenzo JP, et al. Impaired Antibody-  
988 mediated Protection and Defective IgA B-Cell Memory in Experimental Infection of Adults  
989 with Respiratory Syncytial Virus. *Am J Respir Crit Care Med*. 2015 May 1;191(9):1040–9.
- 990 44. Delyea C, Bozorgmehr N, Koleva P, Dunsmore G, Shahbaz S, Huang V, et al. CD71+  
991 Erythroid Suppressor Cells Promote Fetomaternal Tolerance through Arginase-2 and PDL-  
992 1. *J Immunol*. 2018 15;200(12):4044–58.
- 993 45. Alamo IG, Kannan KB, Loftus TJ, Ramos H, Efron PA, Mohr AM. Severe trauma and chronic  
994 stress activates extramedullary erythropoiesis. *J Trauma Acute Care Surg*. 2017;83(1):144–  
995 50.

- 996 46. Jackson A, Nanton MR, O'Donnell H, Akue AD, McSorley SJ. Innate immune activation  
997 during Salmonella infection initiates extramedullary erythropoiesis and splenomegaly. *J*  
998 *Immunol.* 2010 Nov 15;185(10):6198–204.
- 999 47. Verhoeven D. Influence of Immunological Maturity on Respiratory Syncytial Virus-Induced  
1000 Morbidity in Young Children. *Viral Immunol.* 2019;32(2):76–83.
- 1001 48. Chaussabel D, Baldwin N. Democratizing systems immunology with modular  
1002 transcriptional repertoire analyses. *Nat Rev Immunol.* 2014;14(4):271–80.
- 1003 49. Chaussabel D, Quinn C, Shen J, Patel P, Glaser C, Baldwin N, et al. A modular analysis  
1004 framework for blood genomics studies: application to systemic lupus erythematosus.  
1005 *Immunity.* 2008 Jul 18;29(1):150–64.
- 1006 50. Gu Z, Eils R, Schlesner M. Complex heatmaps reveal patterns and correlations in  
1007 multidimensional genomic data. *Bioinformatics.* 2016 15;32(18):2847–9.
- 1008 51. Taylor MW, Tsukahara T, McClintick JN, Edenberg HJ, Kwo P. Cyclic changes in gene  
1009 expression induced by Peg-interferon alfa-2b plus ribavirin in peripheral blood monocytes  
1010 (PBMC) of hepatitis C patients during the first 10 weeks of treatment. *J Transl Med.* 2008  
1011 Nov 5;6:66.
- 1012 52. Malhotra S, Bustamante MF, Pérez-Miralles F, Rio J, Ruiz de Villa MC, Vegas E, et al. Search  
1013 for specific biomarkers of IFN $\beta$  bioactivity in patients with multiple sclerosis. *PLoS ONE.*  
1014 2011;6(8):e23634.
- 1015



A.

B.

bioRxiv preprint doi: <https://doi.org/10.1101/527812>; this version posted May 10, 2020. The copyright holder for this preprint (which was not certified by peer review) is the author/funder. All rights reserved. No reuse allowed without permission.

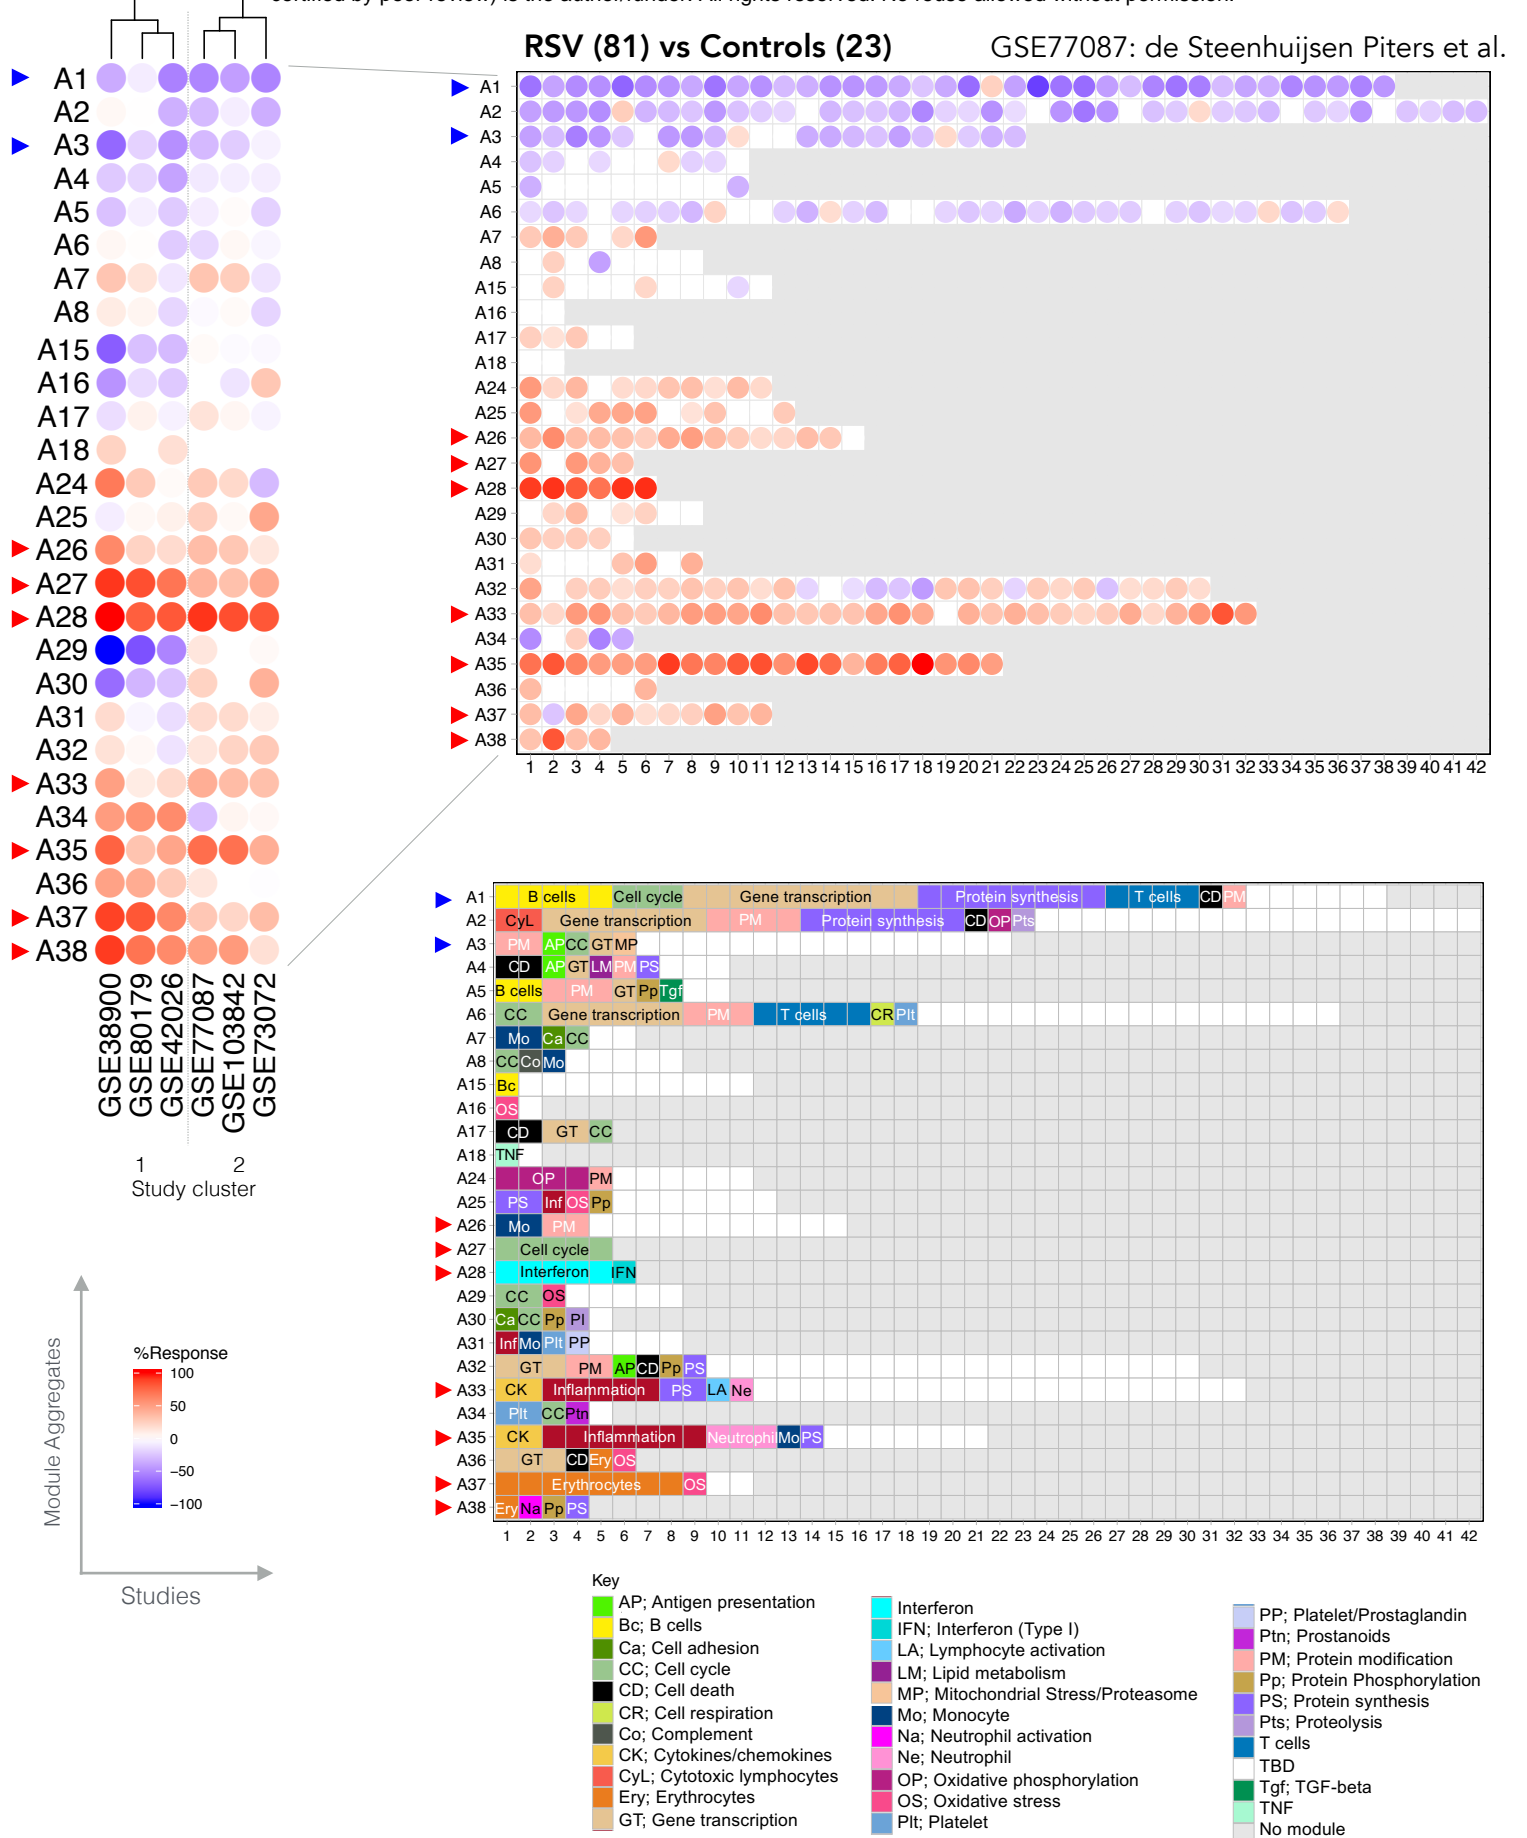

Figure 1

# GSE77087: de Steenhuijsen Piters et al.

bioRxiv preprint doi: <https://doi.org/10.1101/527812>; this version posted May 10, 2020. The copyright holder for this preprint (which was not certified by peer review) is the author/funder. All rights reserved. No reuse allowed without permission.

## RSV (81)

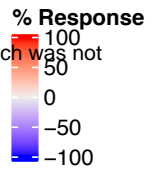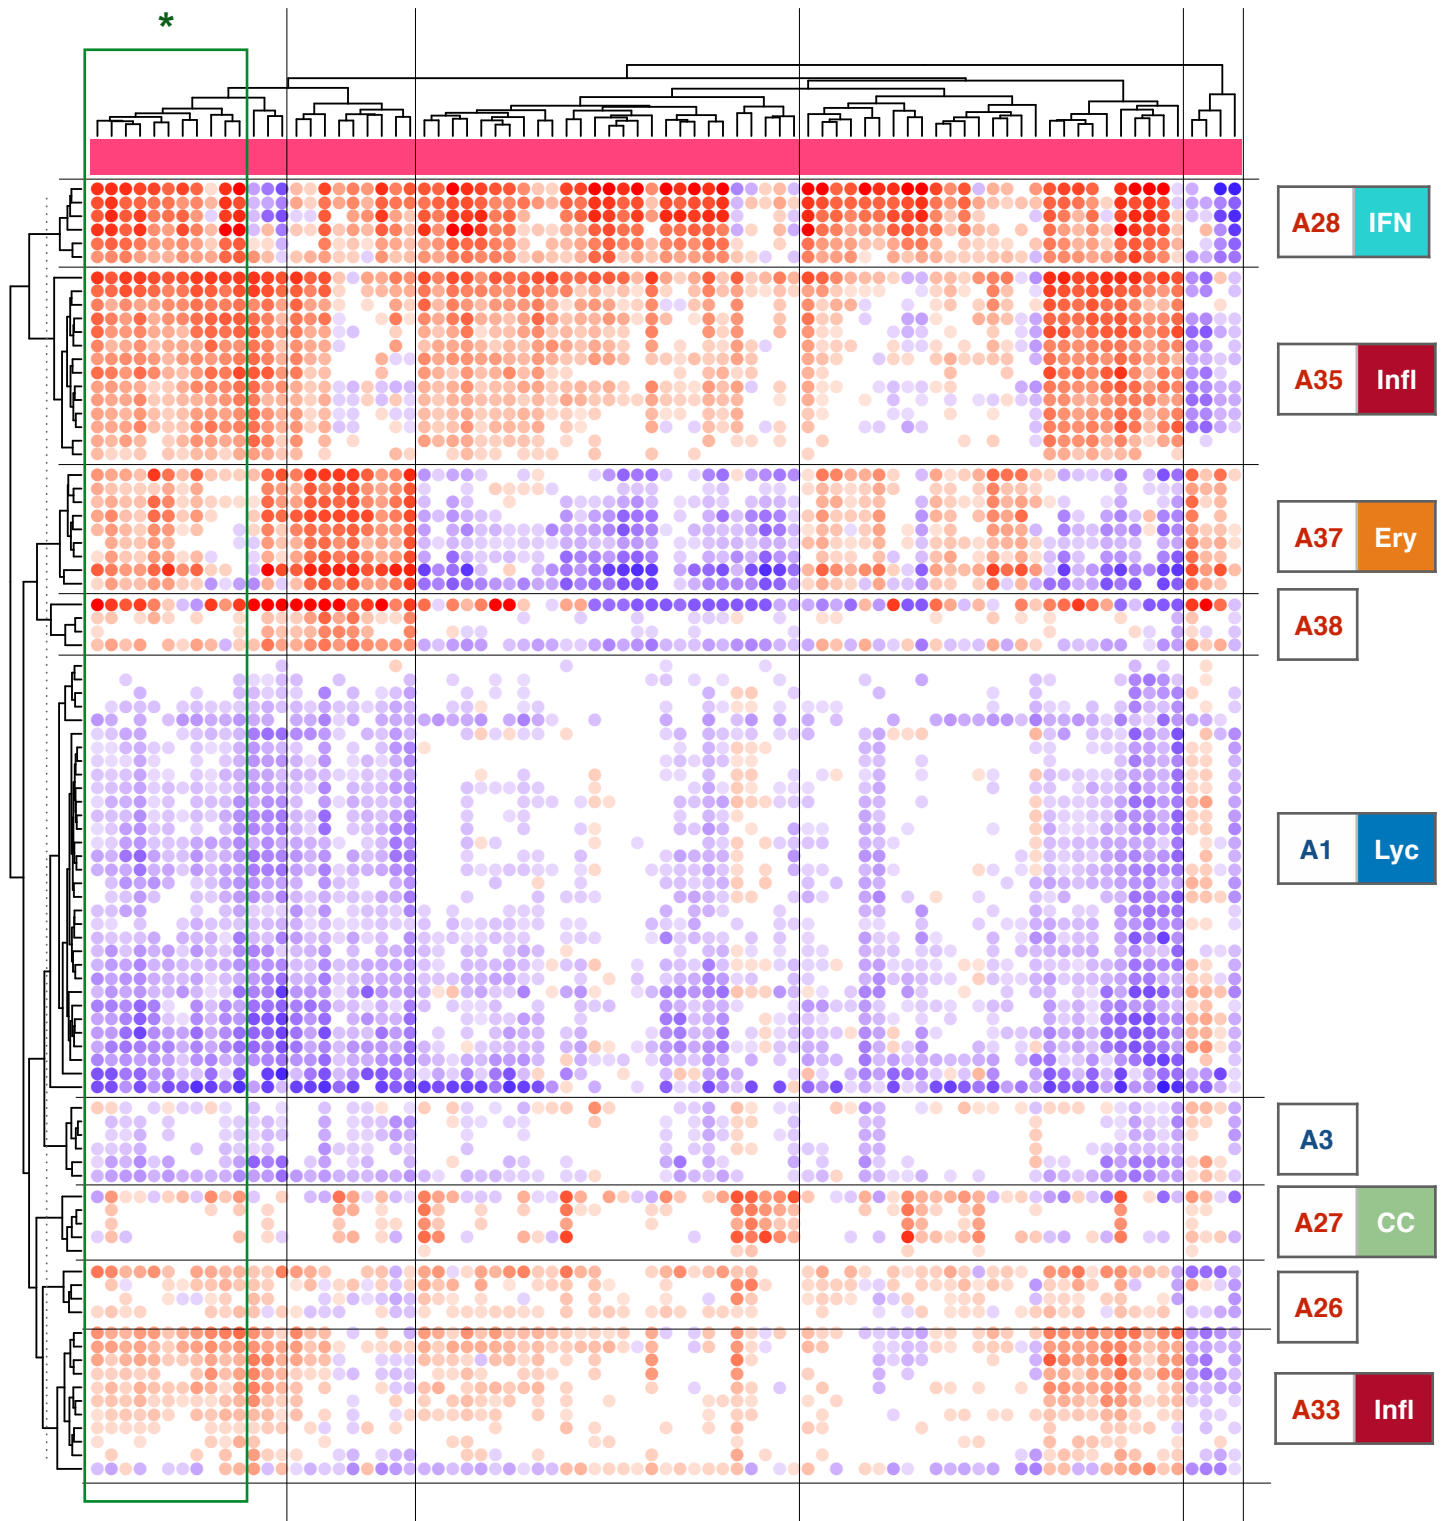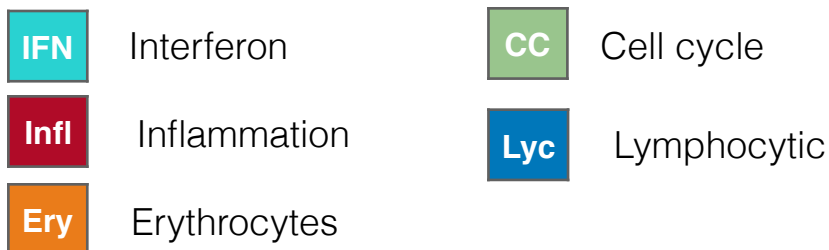

Figure 2

# A. PCA

bioRxiv preprint doi: <https://doi.org/10.1101/527812>; this version posted May 10, 2020. The copyright holder for this preprint (which was not certified by peer review) is the author/funder. All rights reserved. No reuse allowed without permission.

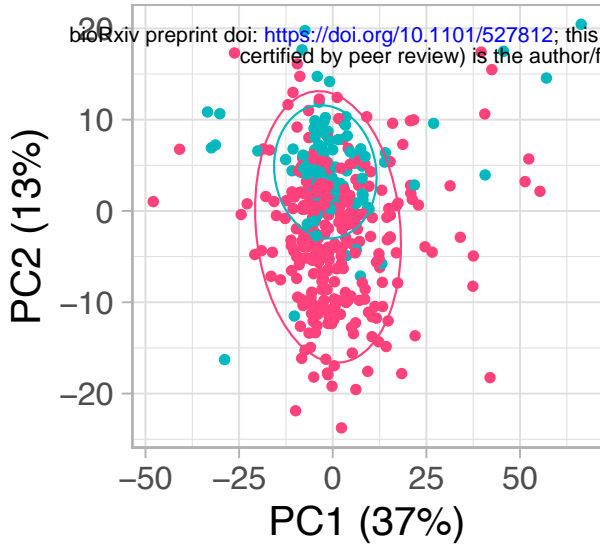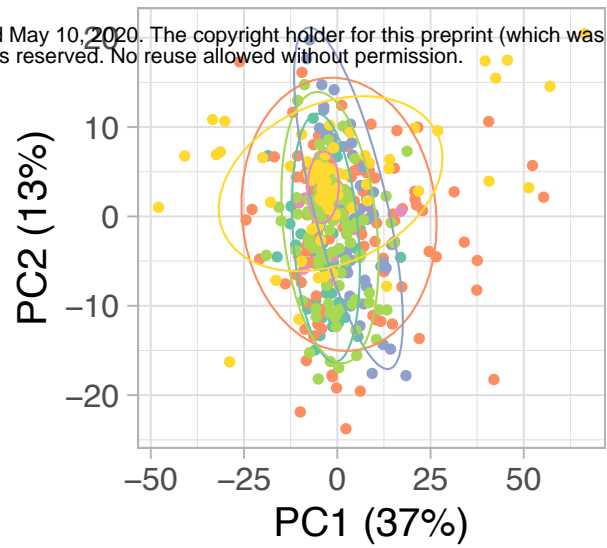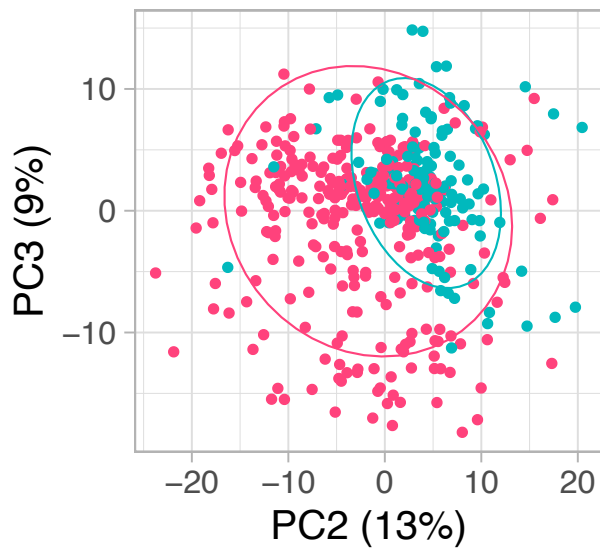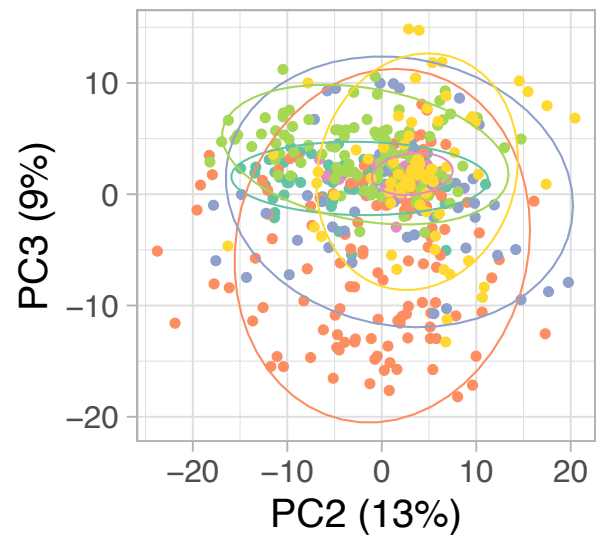

## Groups

- Control (cyan dot)
- RSV (pink dot)

## Studies

- GSE103842 (green dot)
- GSE38900 (orange dot)
- GSE42026 (blue dot)
- GSE73072 (pink dot)
- GSE77087 (light green dot)
- GSE80179 (yellow dot)

# B.

## tSNE

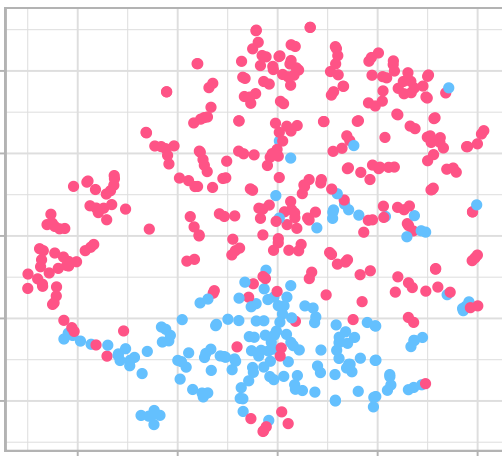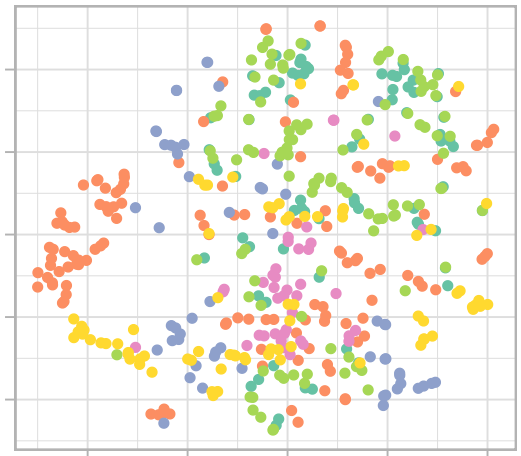

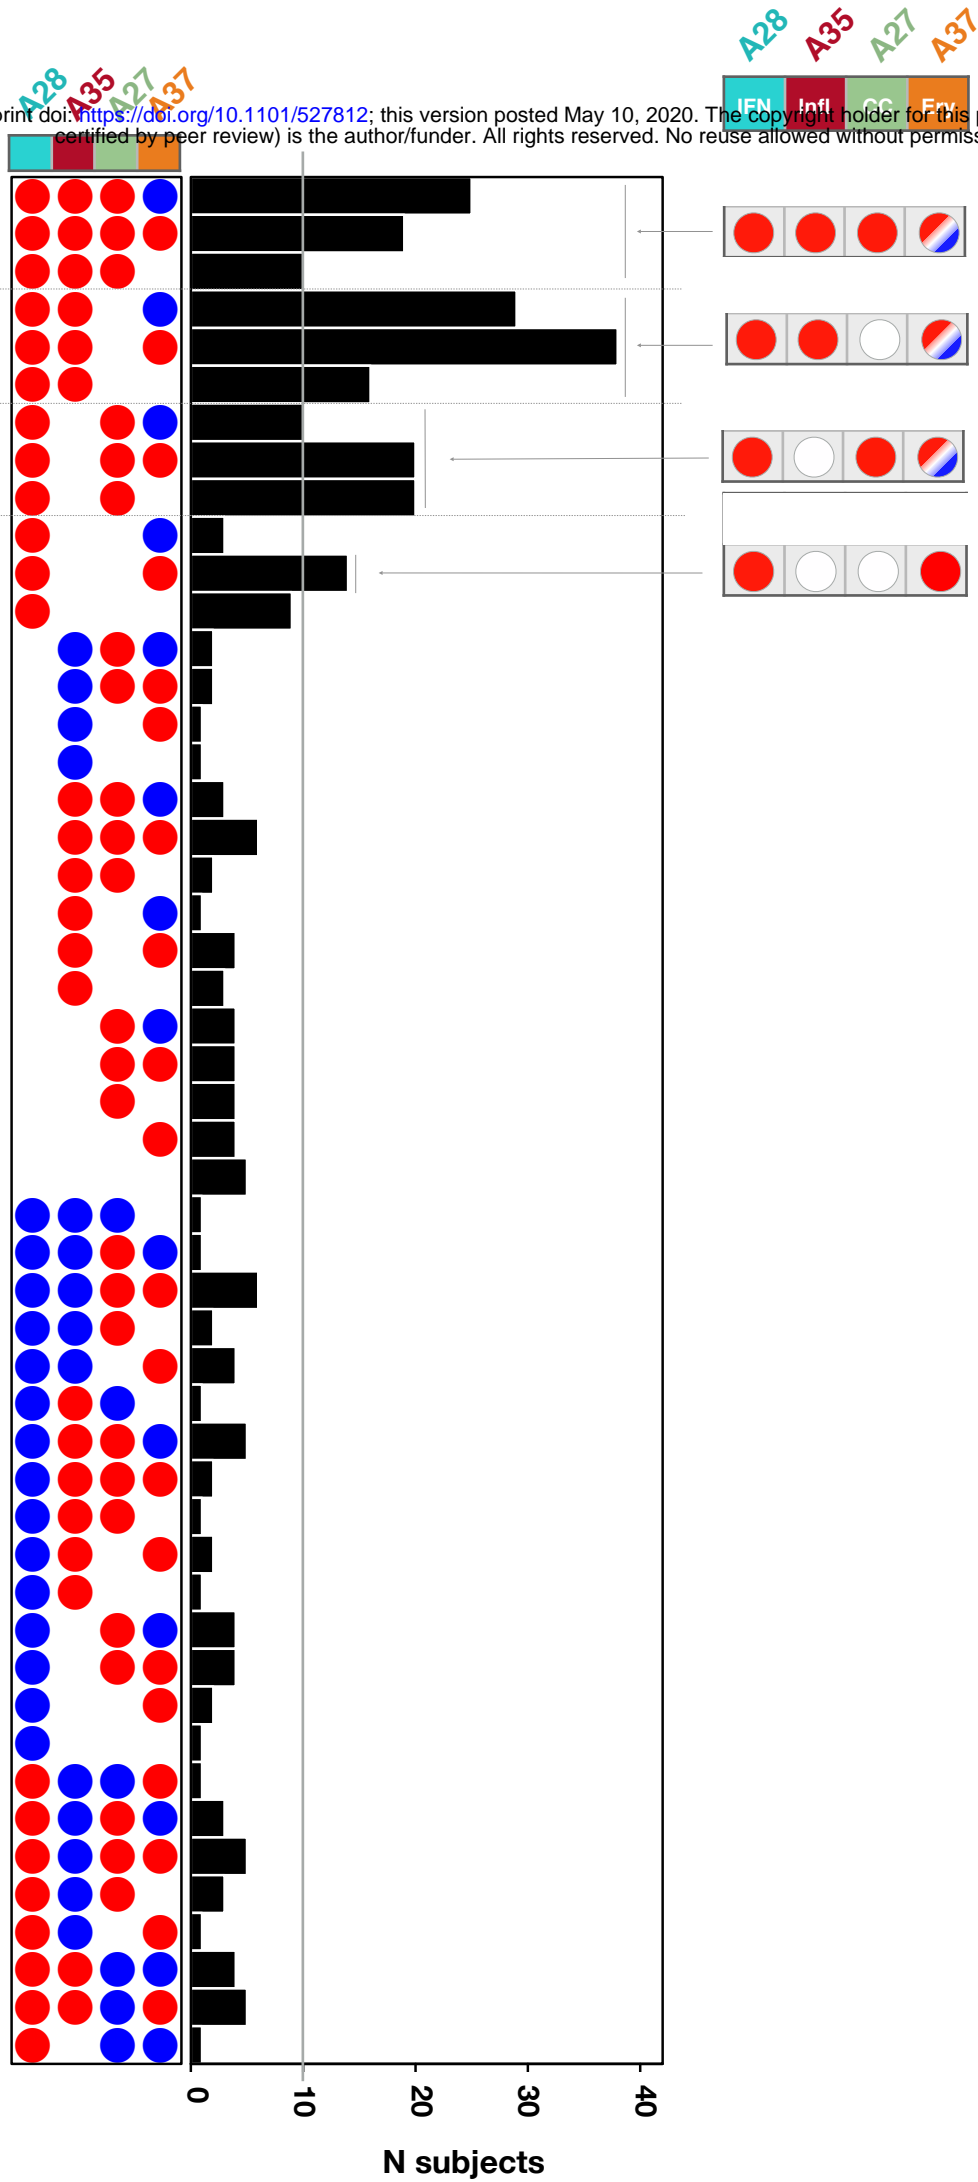

Figure 4



A.

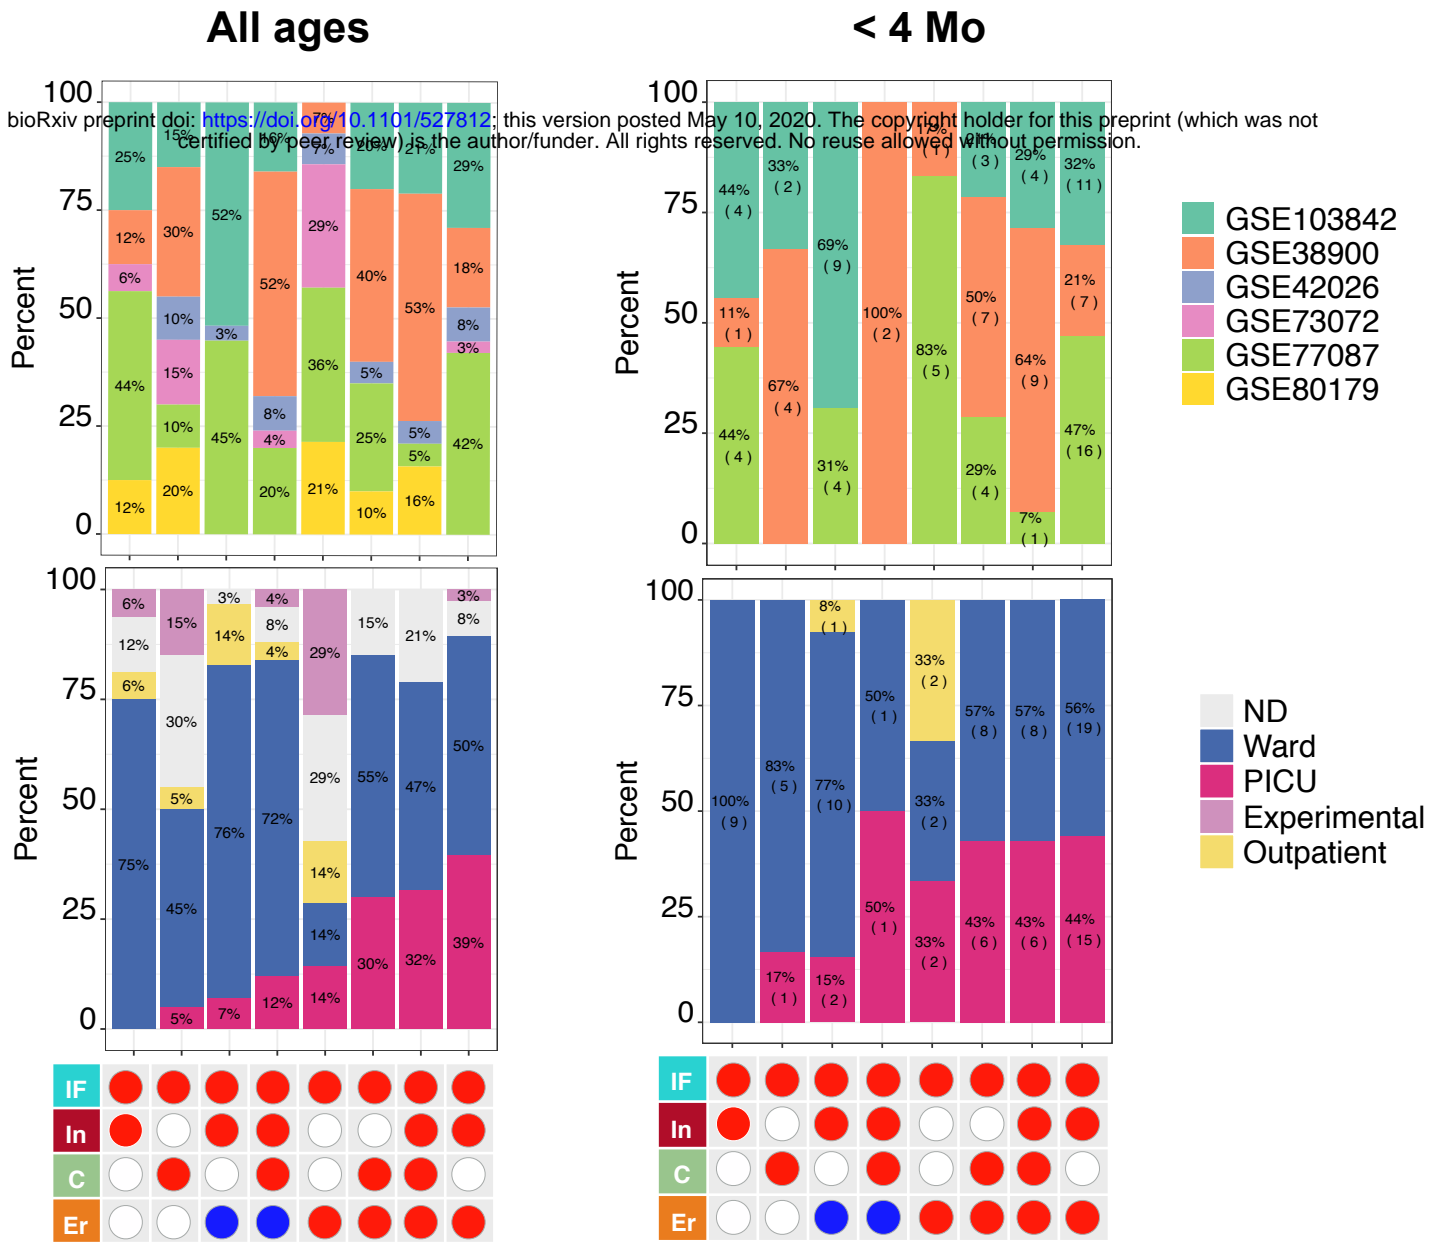

B.

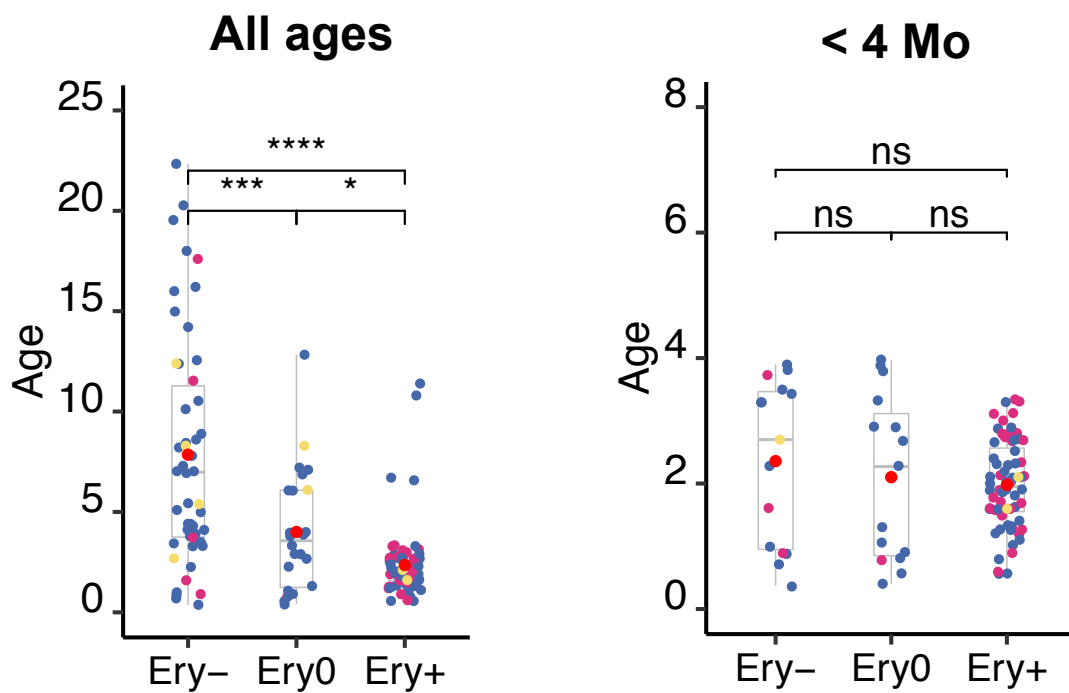

Figure 6



A28 IFN

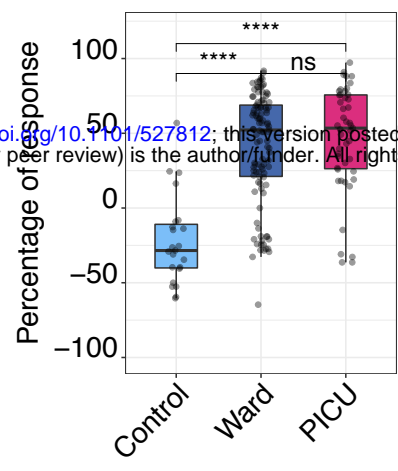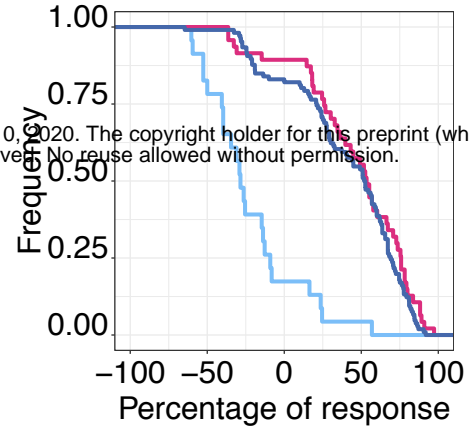

A35 Infl

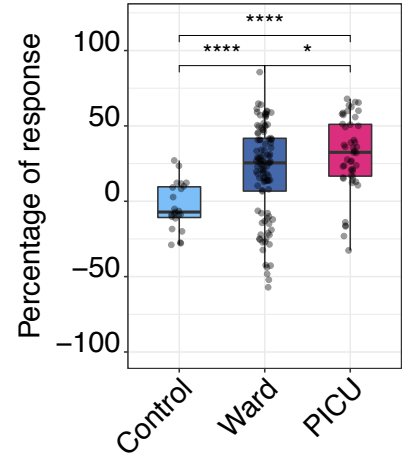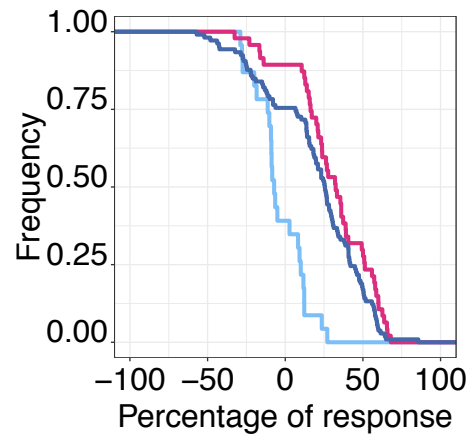

A27 CC

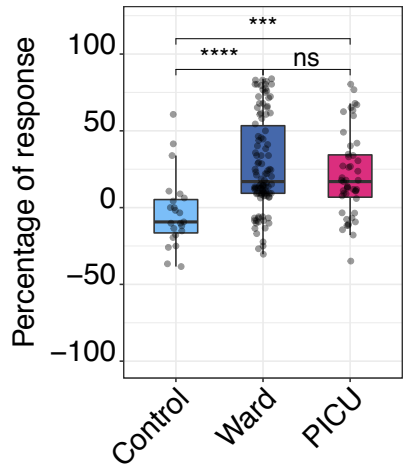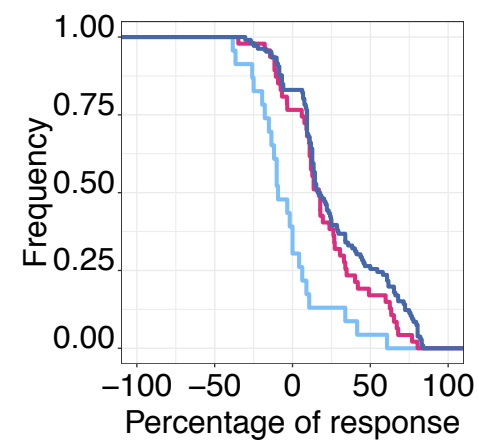

A37 Ery

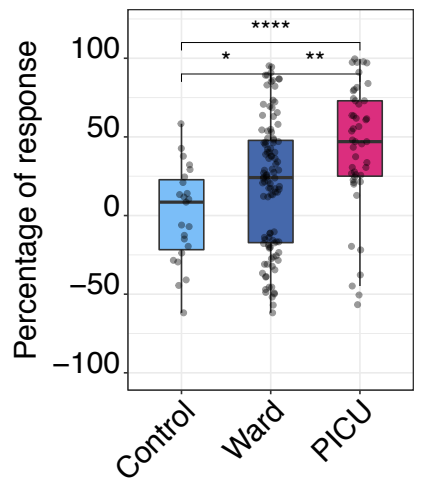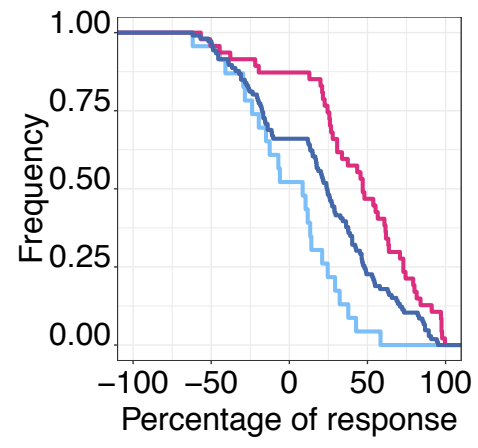

Figure 7

A.

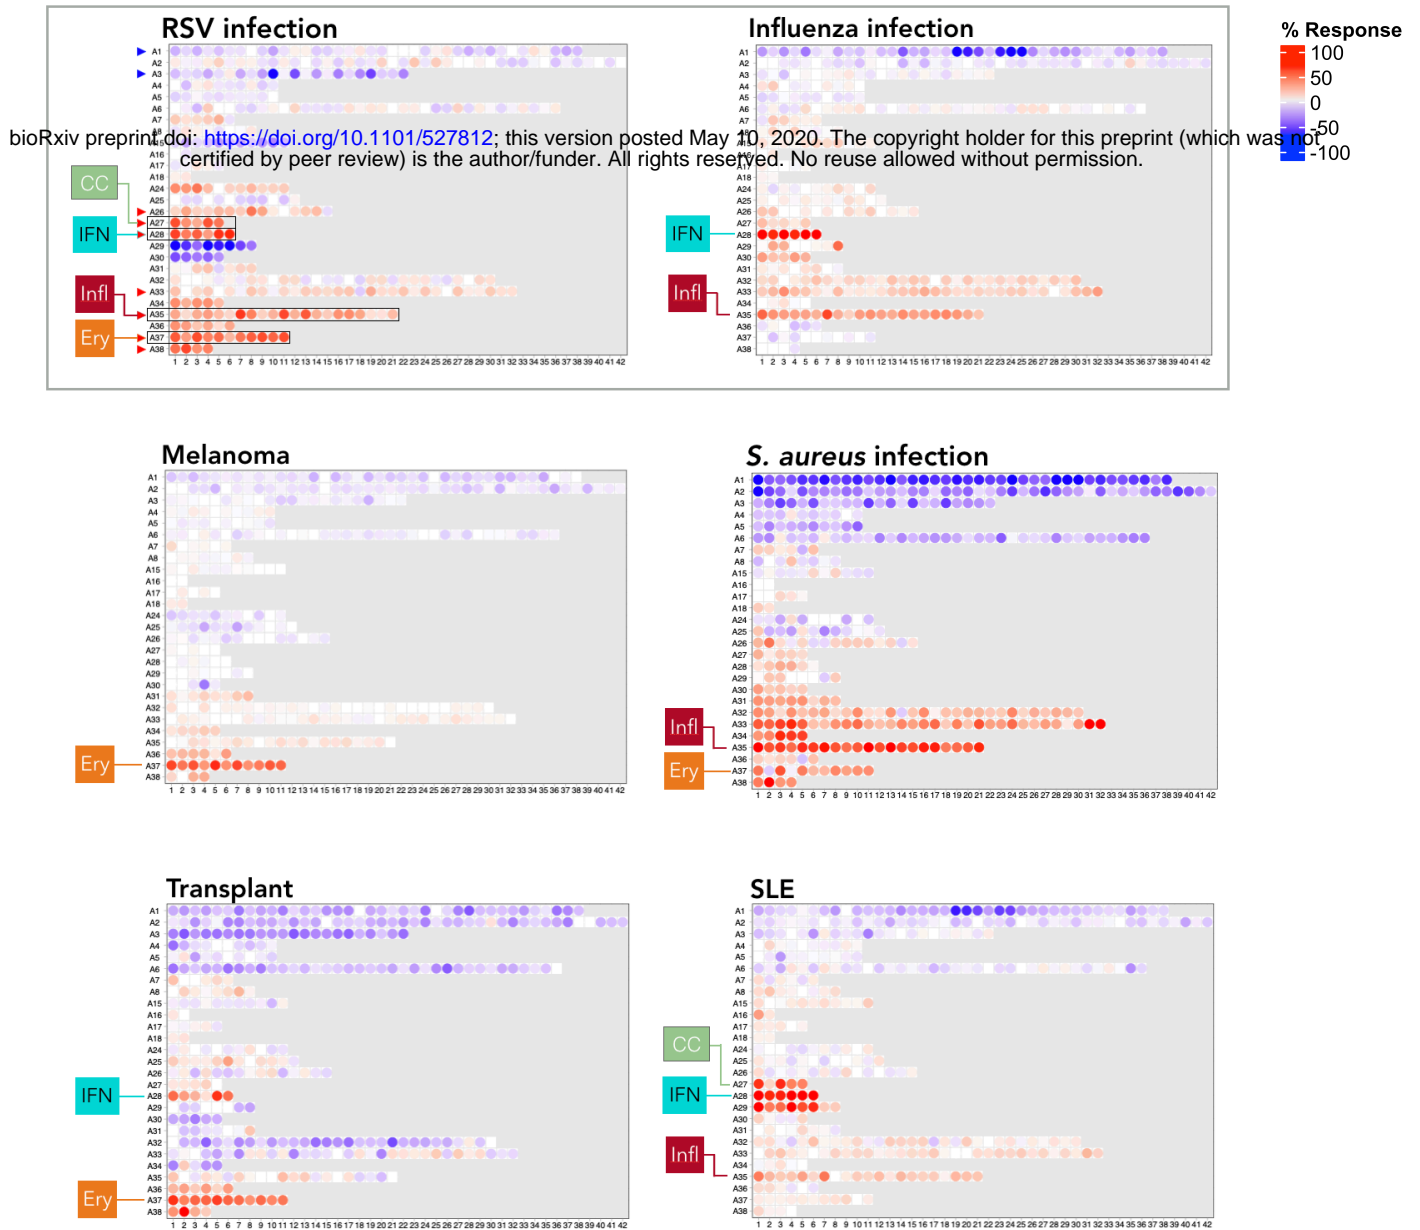

B.

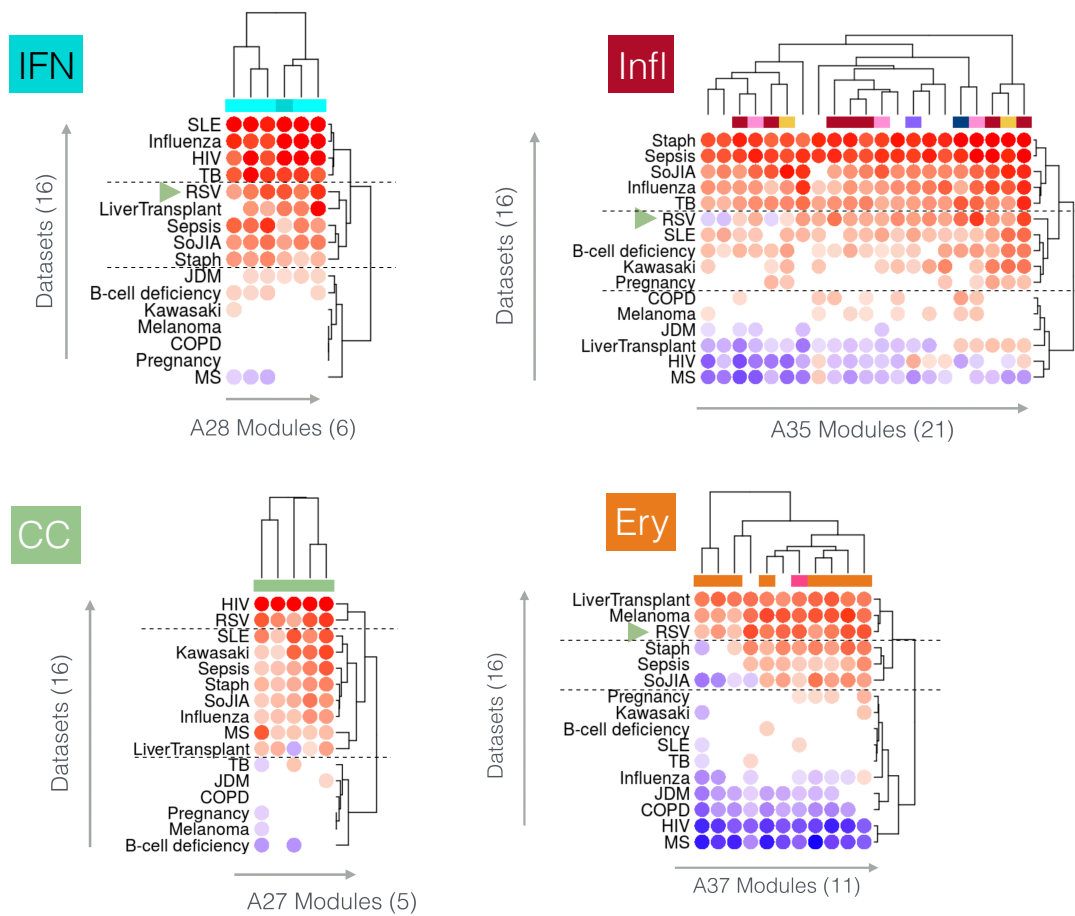

Figure 8



# A37 (11 modules)

Ery

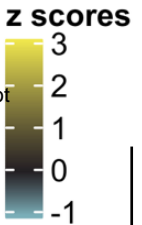

bioRxiv preprint doi: <https://doi.org/10.1101/527812>; this version posted May 10, 2020. The copyright holder for this preprint (which was not certified by peer review) is the author/funder. All rights reserved. No reuse allowed without permission.

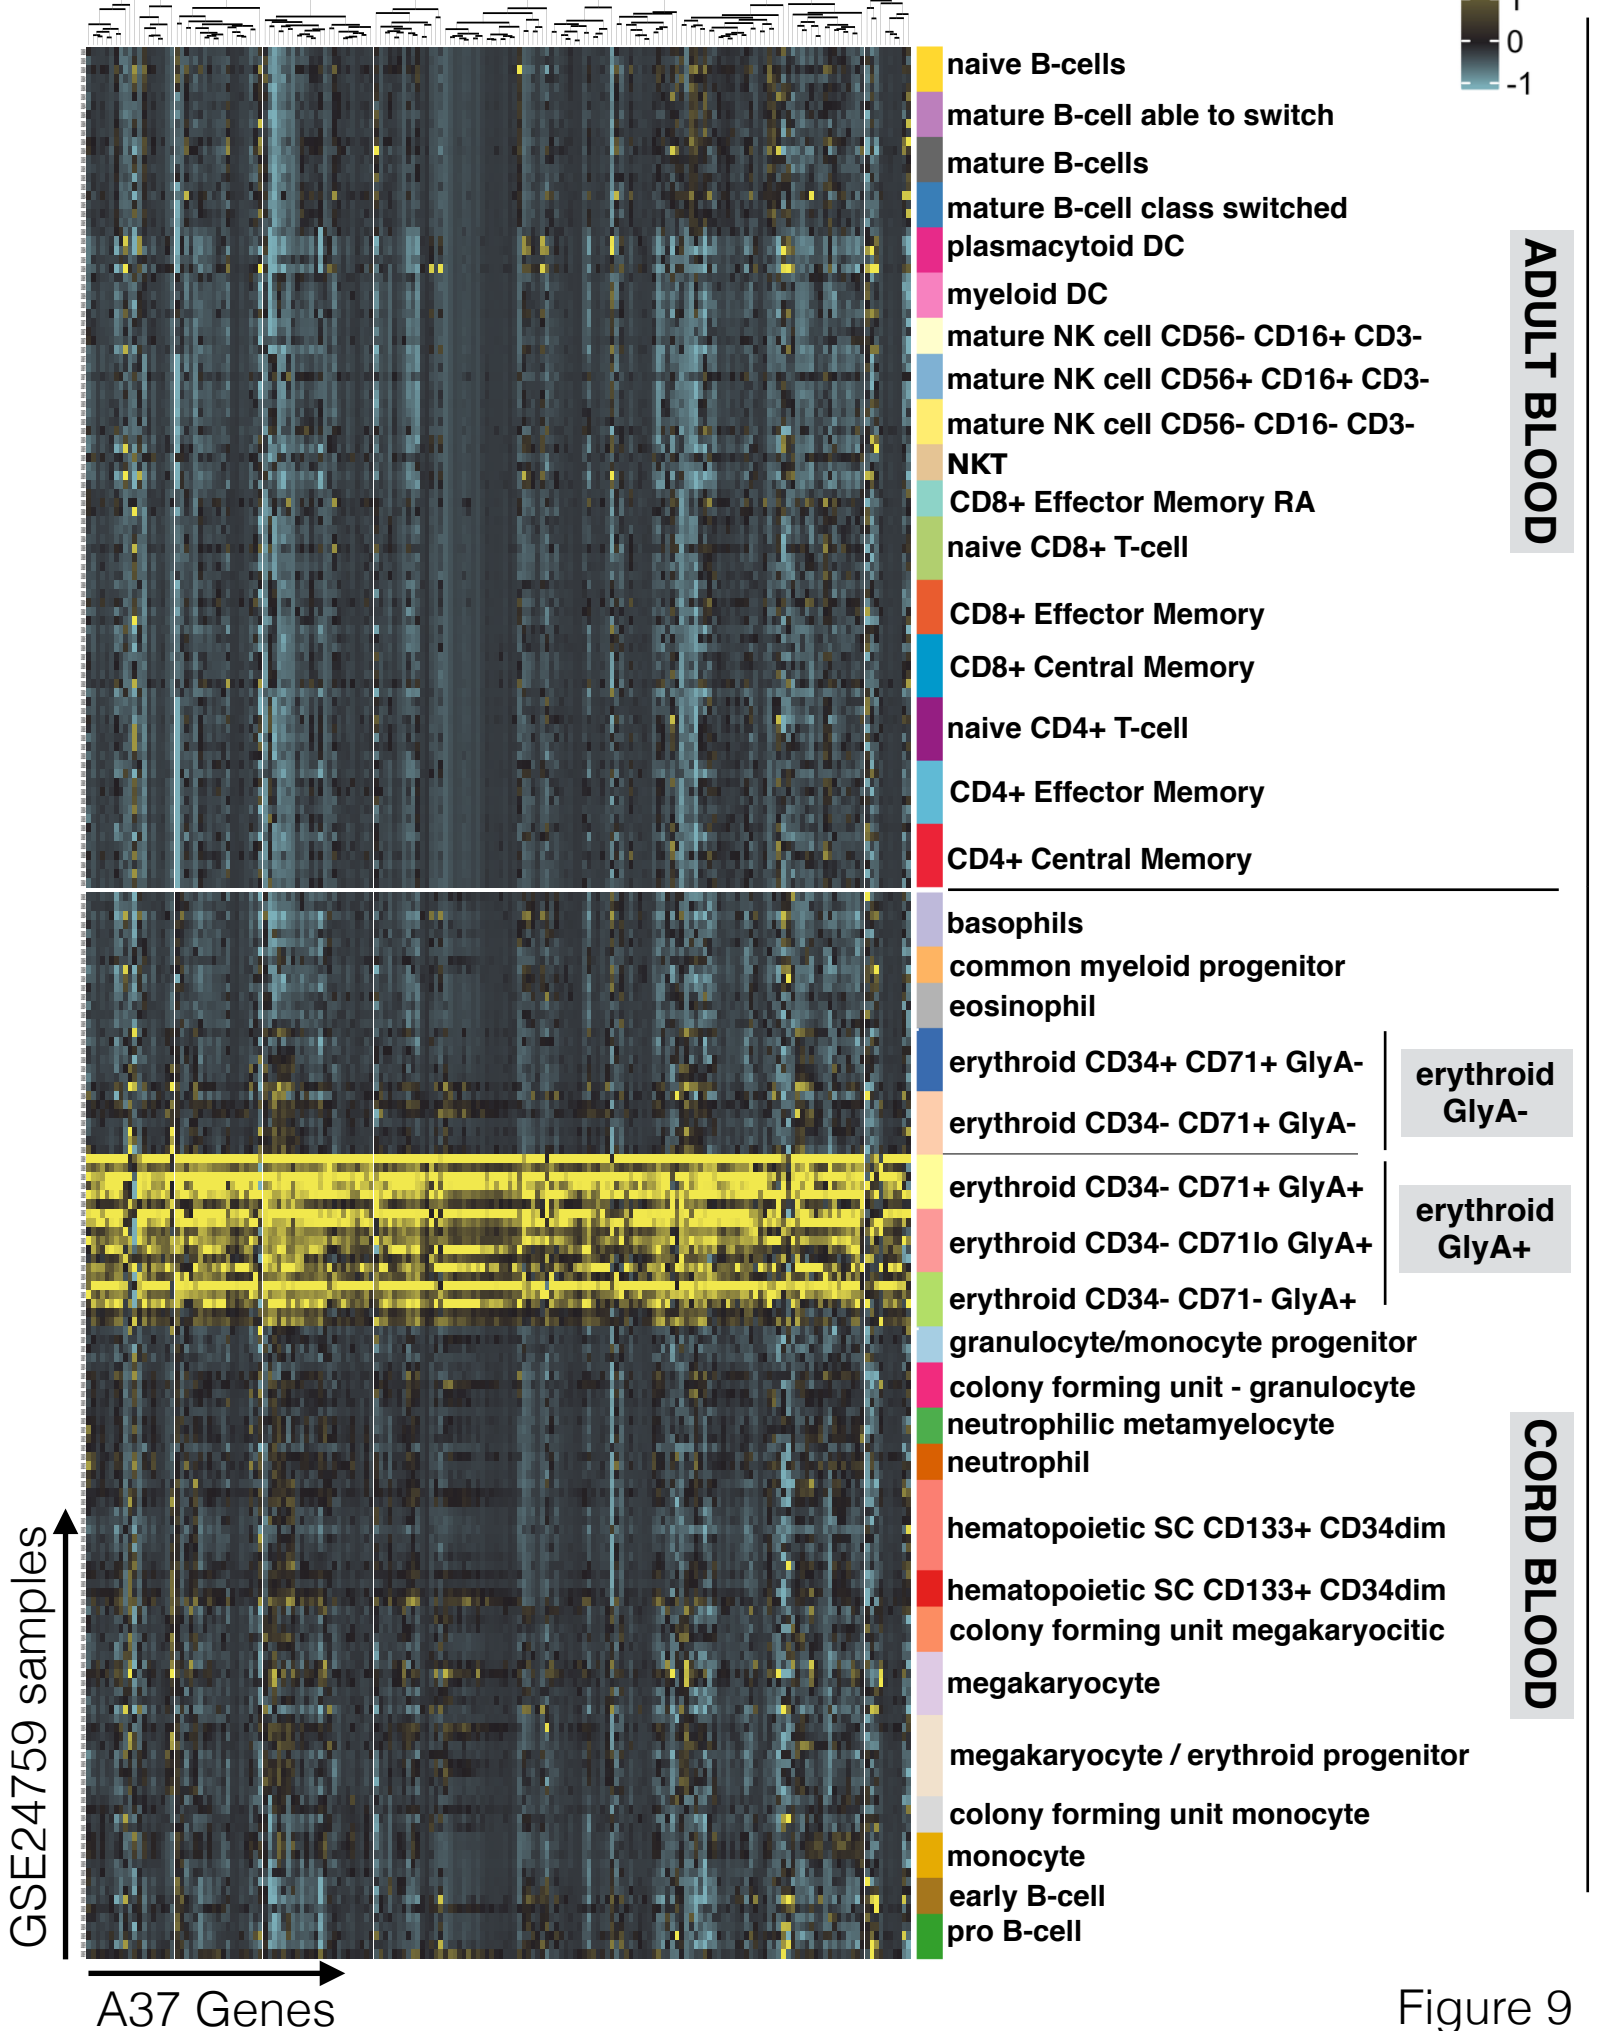

Figure 9

# RSV

bioRxiv preprint doi: <https://doi.org/10.1101/527812>; this version posted May 10, 2020. The copyright holder for this preprint (which was not certified by peer review) is the author/funder. All rights reserved. No reuse allowed without permission.

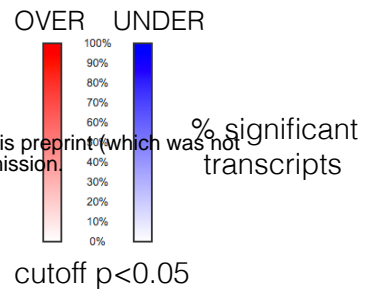

GSE42026: Herberg et al.

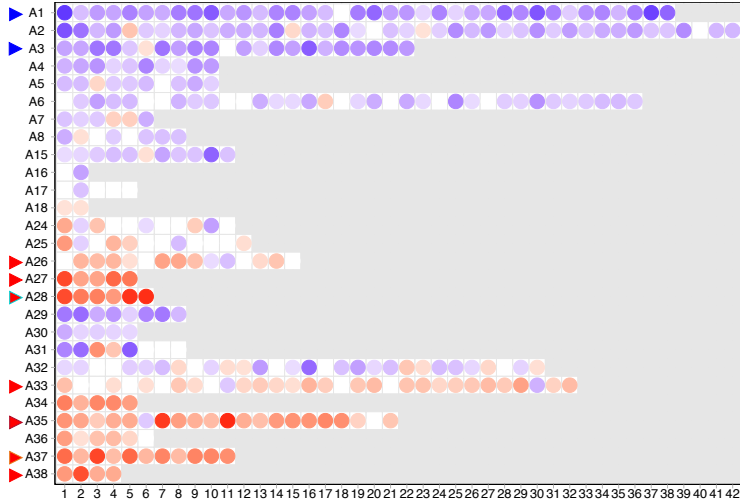

GSE38900: Mejias et al.

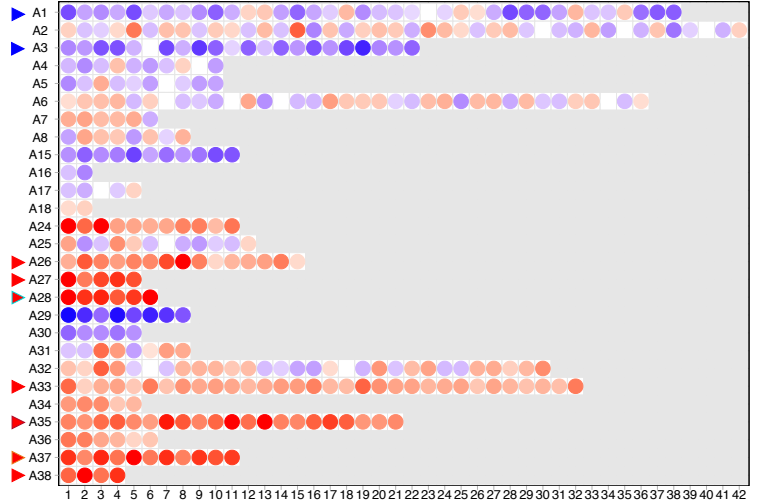

GSE73072: Liu et al.

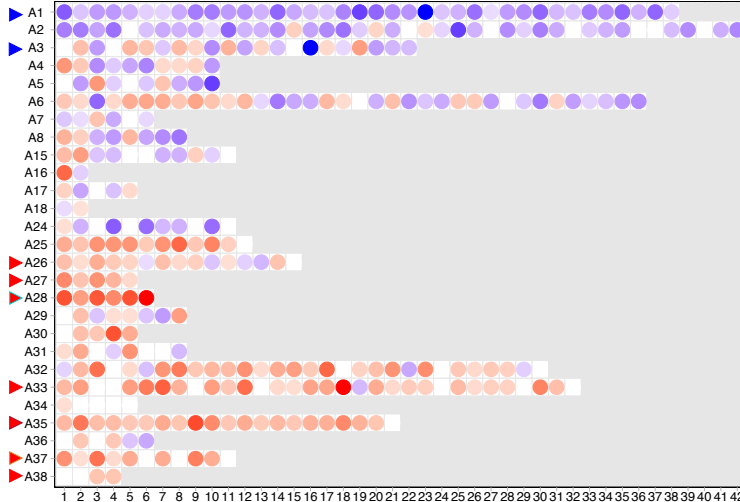

GSE77087: de Steenhuijsen Piters et al.

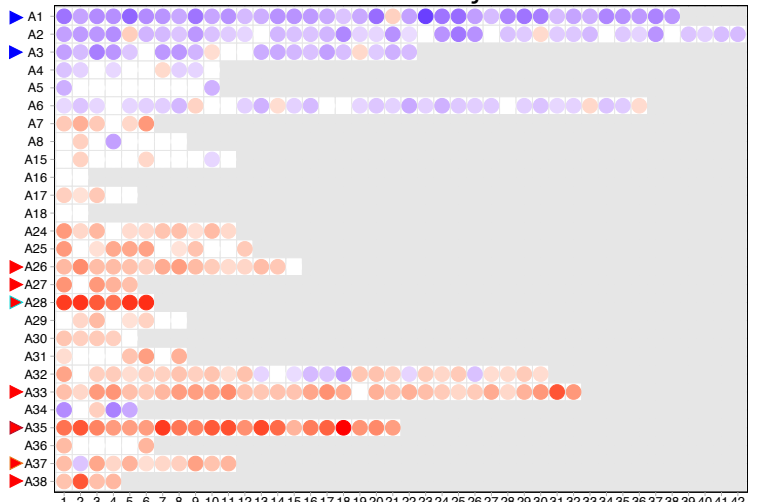

GSE80179: McDonald et al.

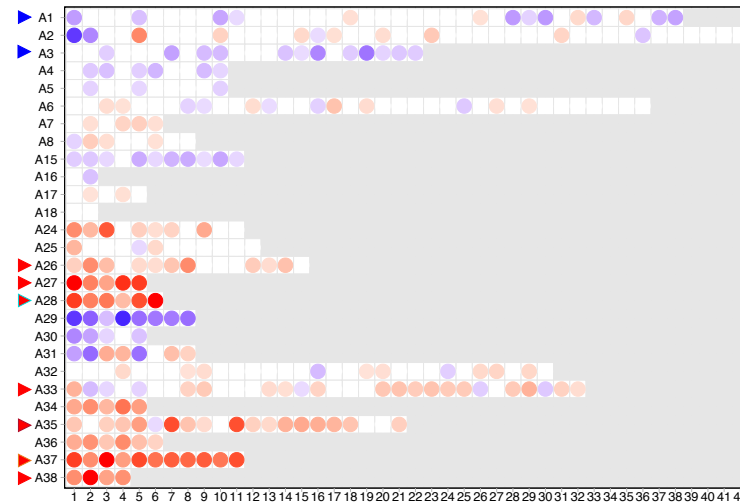

GSE103842: Rodriguez-Fernandez et al.

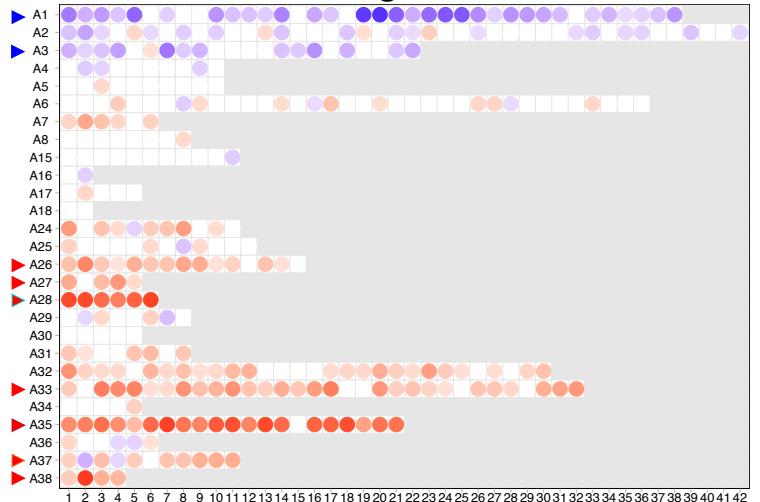

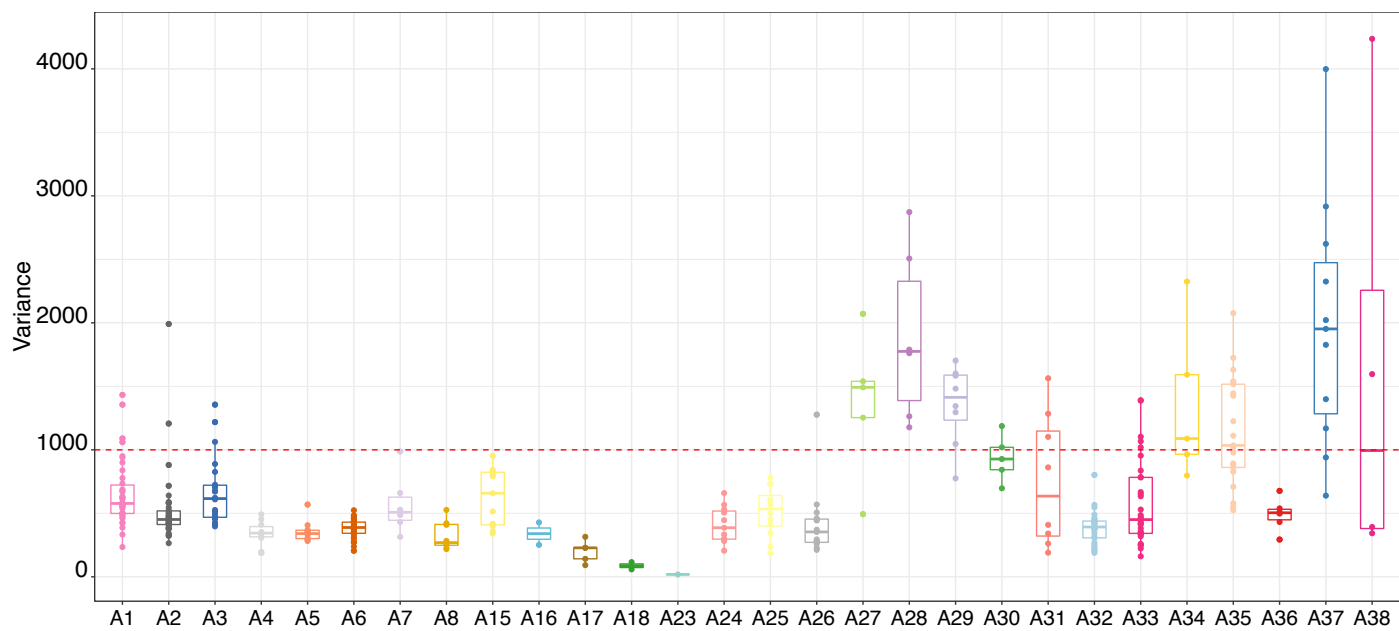

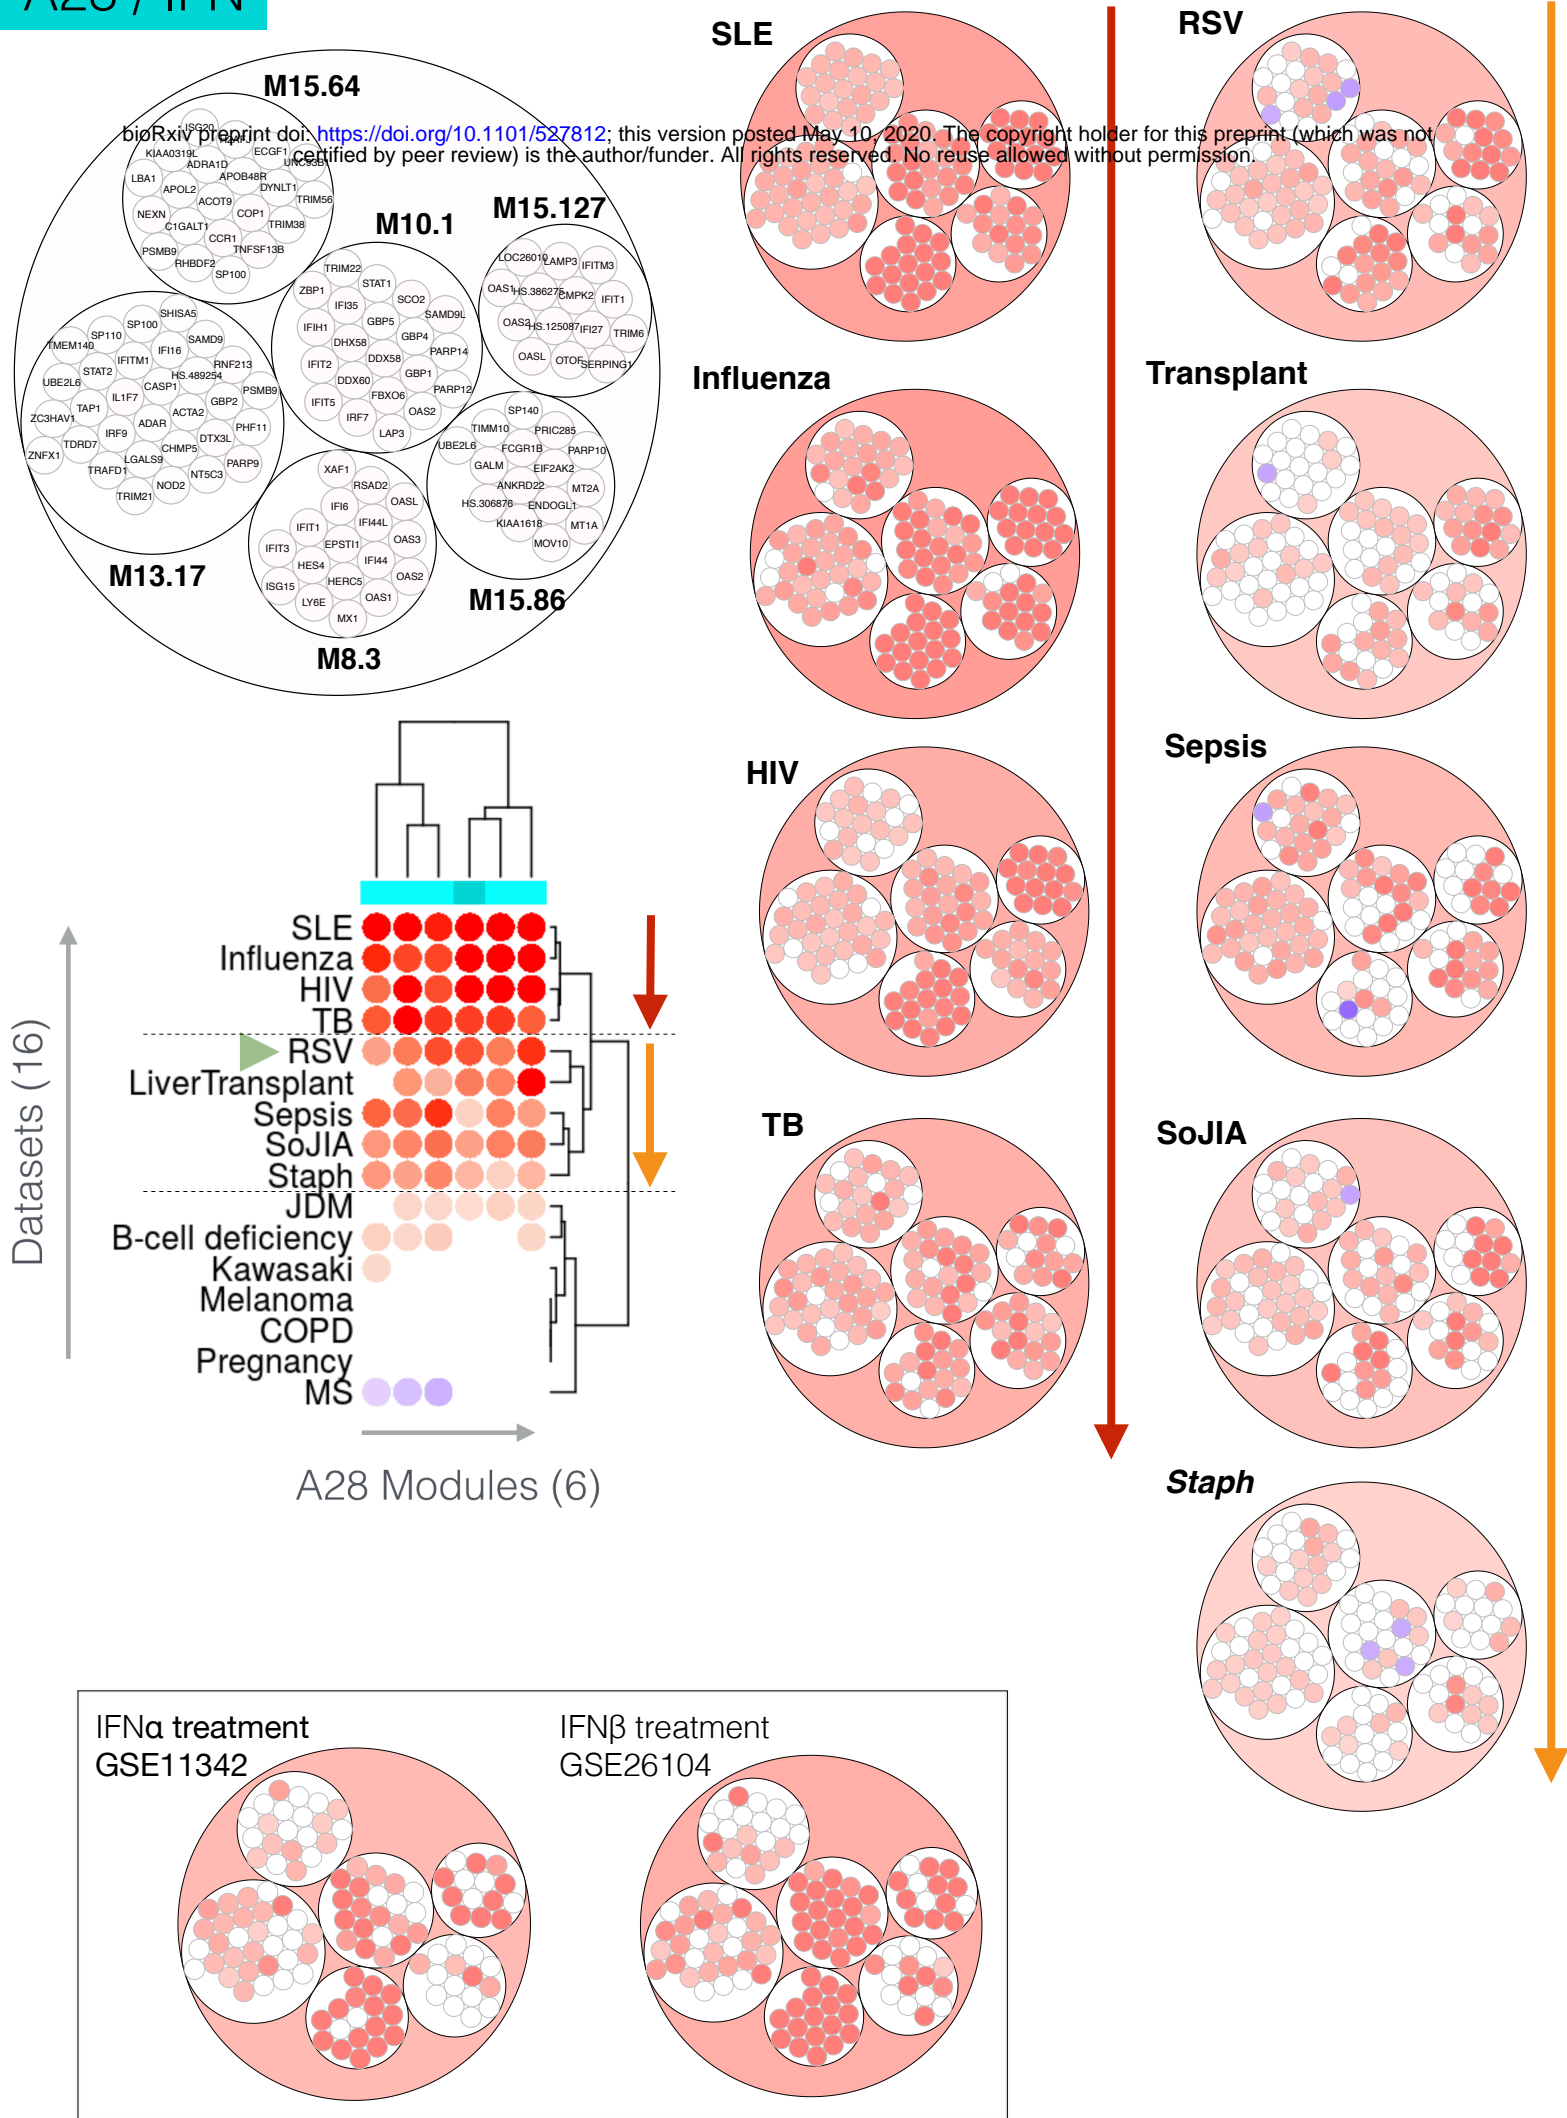

A36

x 6 modules

bioRxiv preprint doi: <https://doi.org/10.1101/527812>; this version posted May 10, 2020. The copyright holder for this preprint (which was not certified by peer review) is the author/funder. All rights reserved. No reuse allowed without permission.

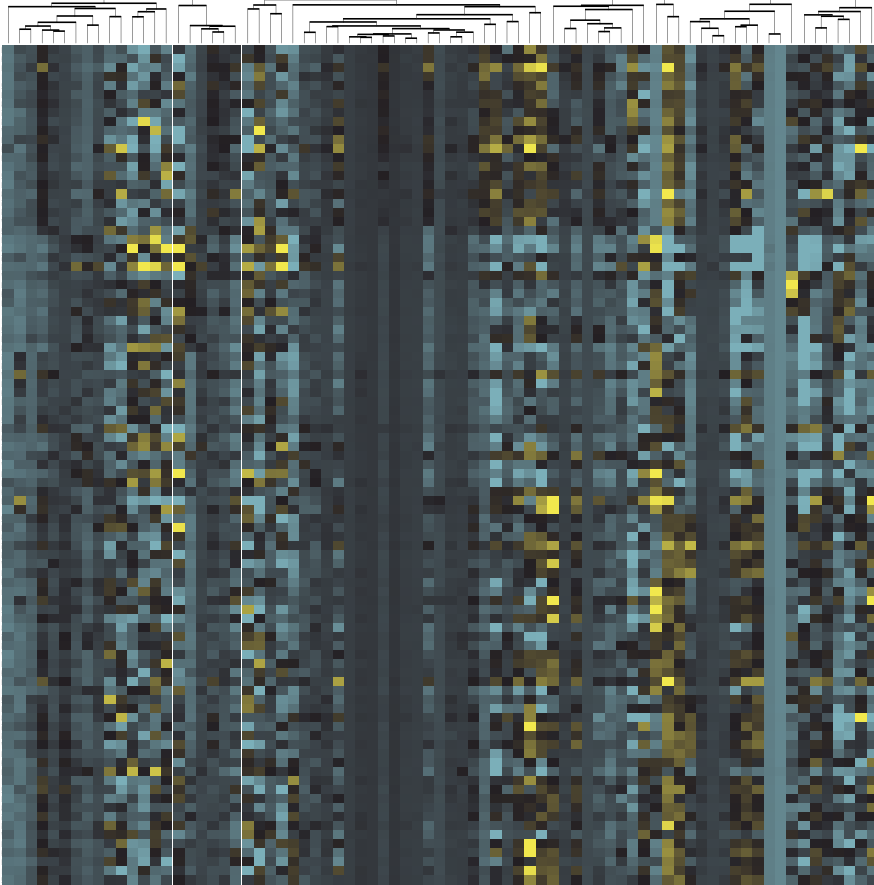

- naive B-cells
- mature B-cell able to switch
- mature B-cells
- mature B-cell class switched
- plasmacytoid DC
- myeloid DC
- mature NK cell CD56- CD16+ CD3-
- mature NK cell CD56+ CD16+ CD3-
- mature NK cell CD56- CD16- CD3-
- NKT
- CD8+ Effector Memory RA
- naive CD8+ T-cell
- CD8+ Effector Memory
- CD8+ Central Memory
- naive CD4+ T-cell
- CD4+ Effector Memory
- CD4+ Central Memory

ADULT BLOOD

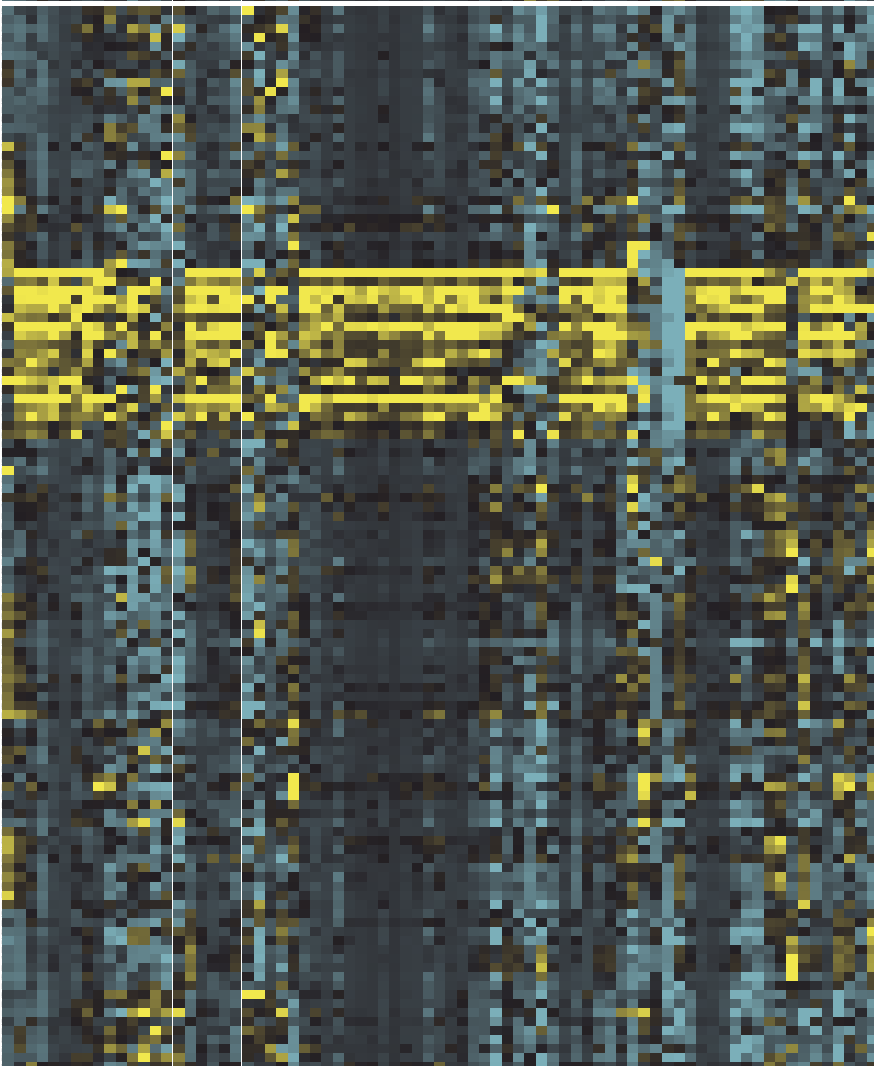

- basophils
- common myeloid progenitor
- eosinophil
- erythroid CD34+ CD71+ GlyA-
- erythroid CD34- CD71+ GlyA-
- erythroid CD34- CD71+ GlyA+
- erythroid CD34- CD71lo GlyA+
- erythroid CD34- CD71- GlyA+
- granulocyte/monocyte progenitor
- colony forming unit - granulocyte
- neutrophilic metamyelocyte
- neutrophil
- hematopoietic SC CD133+ CD34dim
- hematopoietic SC CD133+ CD34dim
- colony forming unit megakaryocytic
- megakaryocyte
- megakaryocyte / erythroid progenitor
- colony forming unit monocyte
- monocyte
- early B-cell
- pro B-cell

erythroid  
GlyA-

erythroid  
GlyA+

CORD BLOOD

A38

x 4 modules

bioRxiv preprint doi: <https://doi.org/10.1101/527812>; this version posted May 10, 2020. The copyright holder for this preprint (which was not certified by peer review) is the author/funder. All rights reserved. No reuse allowed without permission.

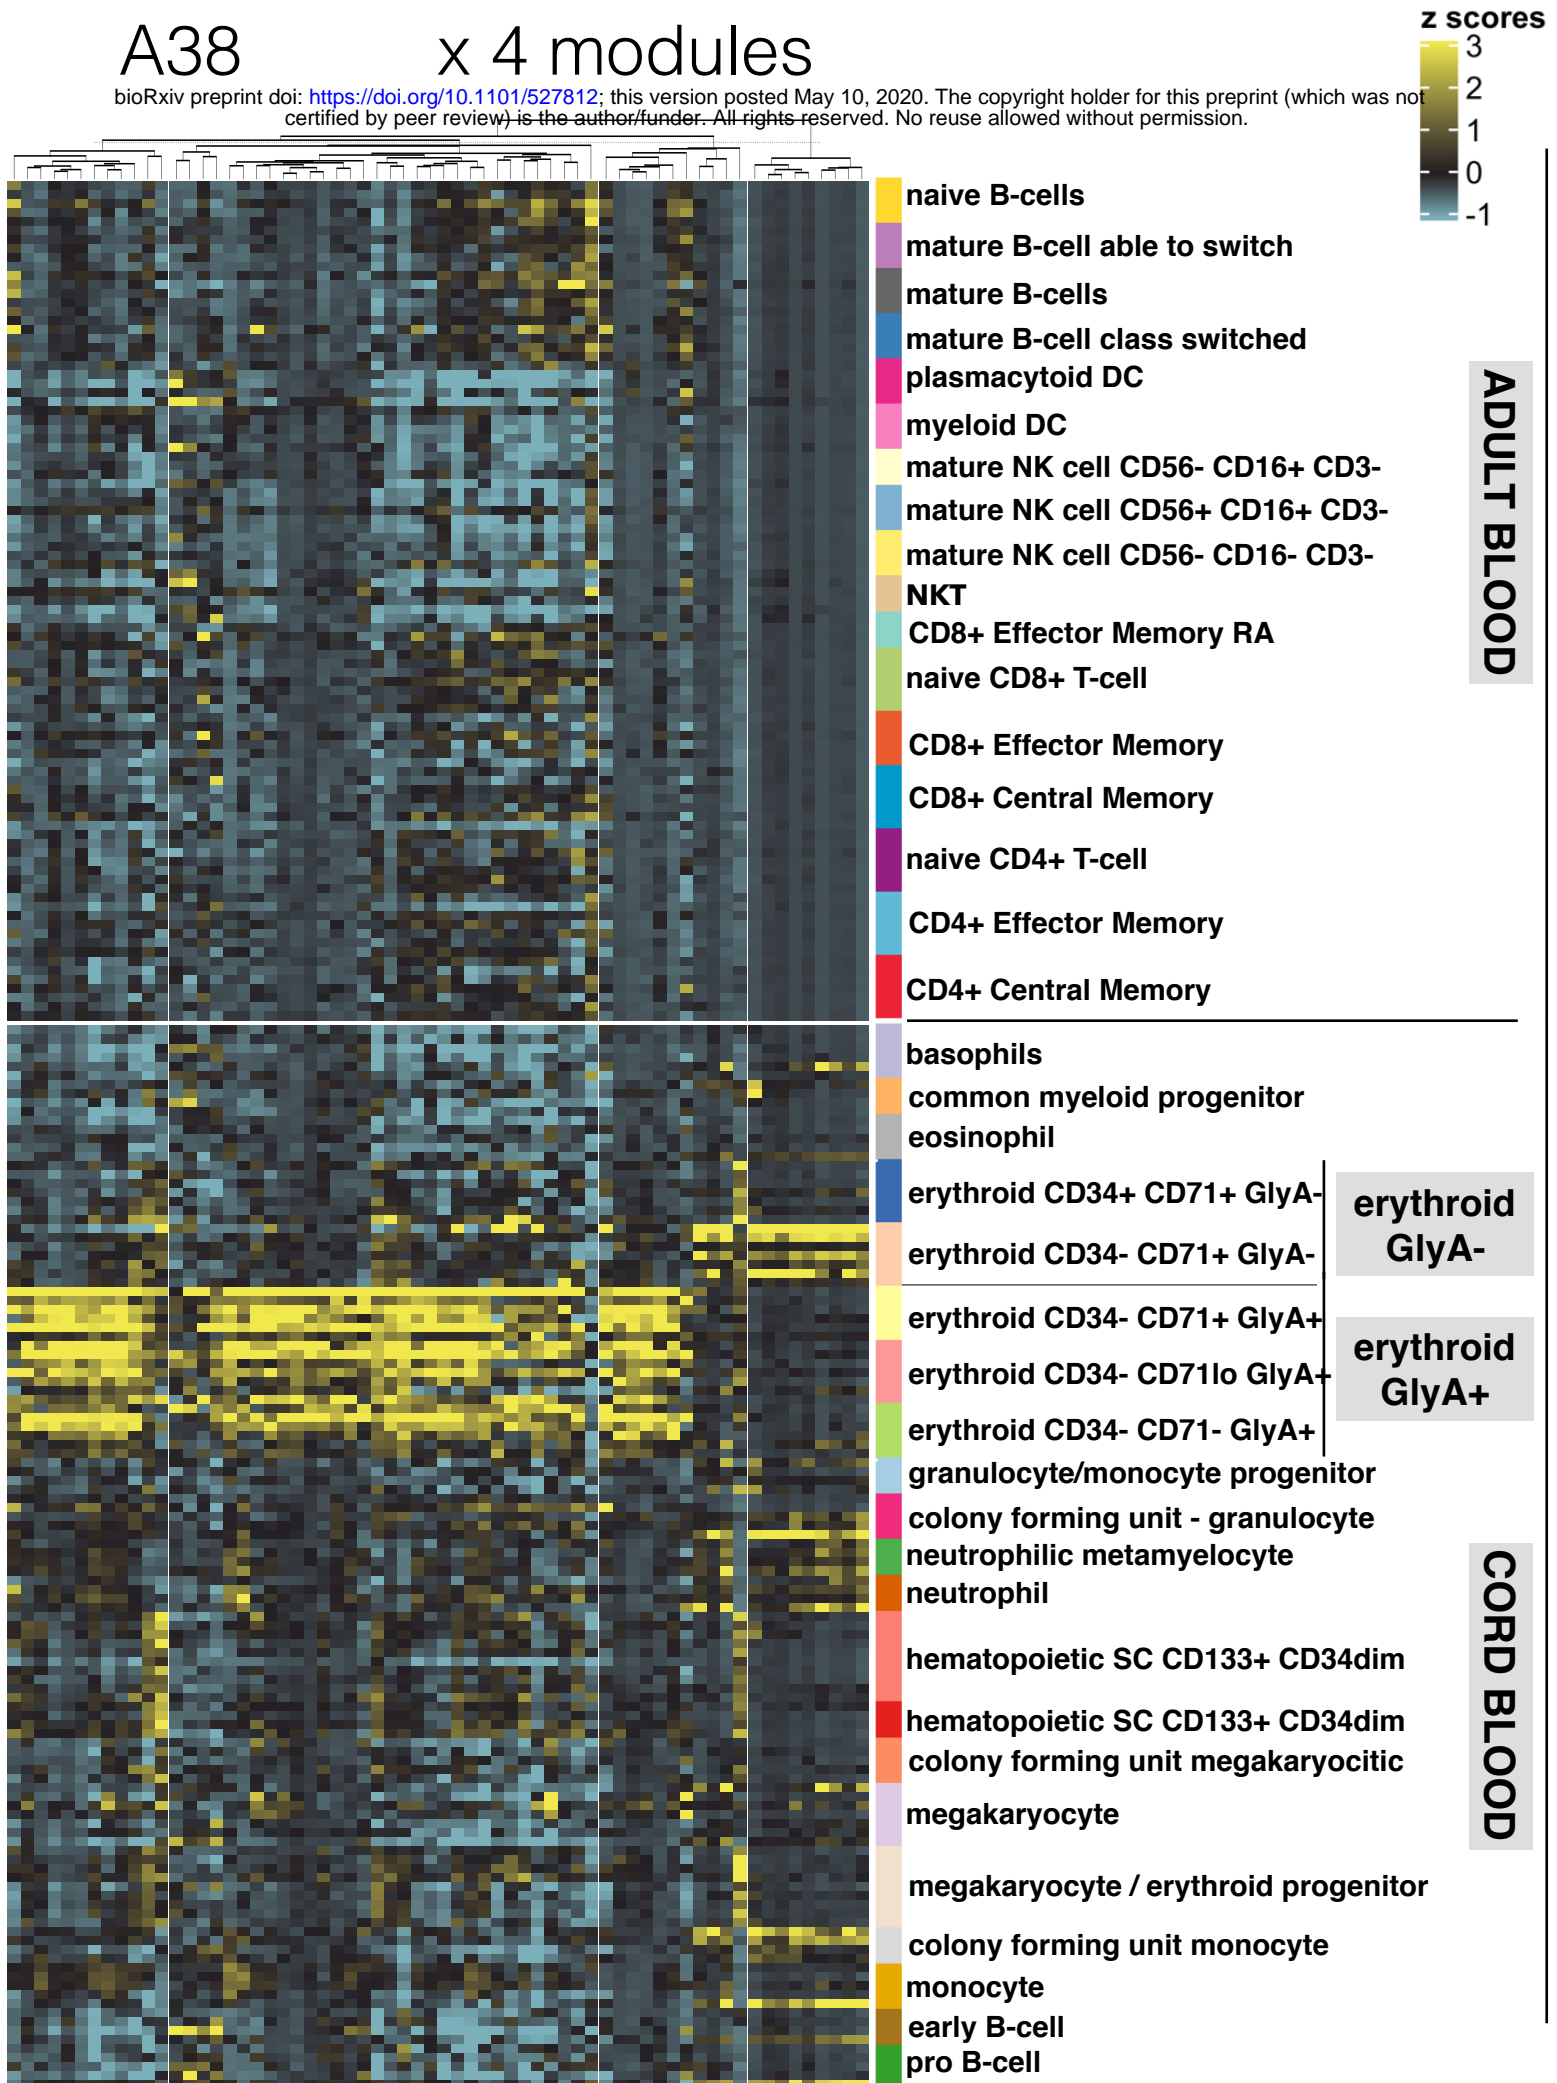

Supplementary Figure 5
